# Supplementary material for: Annular Tautomerism of 3(5)-Disubstituted-1H-pyrazoles with Ester and Amide Groups
Source: PubMed Central journal article supplement (PMC6680591; doi:10.3390/molecules24142632), 2019-07-19
Supplement: molecules-24-02632-s001.pdf [file molecules-24-02632-s001.pdf]

## Annular tautomerism of 3(5)-disubstituted-1H-pyrazoles with ester and amide group

Anna Kusakiewicz-Dawid, Monika Porada, Błażej Dziuk, Dawid Siodlak\*  
 Faculty of Chemistry, University of Opole, Oleska 48, 45-052 Opole, Poland,  
 e-mail: dsiodlak@uni.opole.pl

## Table of contents

|                    |                                                                                                                                                                             |    |
|--------------------|-----------------------------------------------------------------------------------------------------------------------------------------------------------------------------|----|
| <b>Table 1S.</b>   | Selected geometric parameters for <i>N</i> -Methyl 5-methyl-1H-pyrazole-3-carboxylamide ( <b>1a</b> )<br>CH <sub>3</sub> -Pz-CONHCH <sub>3</sub> (Å, °)                     | 3  |
| <b>Table 2S.</b>   | Selected geometric parameters for ethyl 5-methyl-1H-pyrazole-3-carboxylate ( <b>1b</b> )<br>CH <sub>3</sub> -Pz-COOCH <sub>2</sub> CH <sub>3</sub> (Å, °)                   | 5  |
| <b>Table 3S.</b>   | Selected geometric parameters for methyl 5-amino-1H-pyrazole-3-carboxylate ( <b>2b</b> )<br>H <sub>2</sub> N-Pz-COOCH <sub>3</sub> (Å, °)                                   | 6  |
| <b>Table 4S.</b>   | Selected geometric parameters for methyl 3-nitro-1H-pyrazole-5-carboxylate ( <b>3b</b> )<br>N <sub>2</sub> O-Pz-COOCH <sub>3</sub> (Å, °)                                   | 9  |
| <b>Table 5S.</b>   | Selected geometric parameters for Methylammonium 3-nitro-1H-pyrazole-5-carboxylate ( <b>4</b> )<br>N <sub>2</sub> OPzCOO <sup>-</sup> MeNH <sub>3</sub> <sup>+</sup> (Å, °) | 10 |
| <b>Table 6S.</b>   | Selected hydrogen-bond parameters                                                                                                                                           | 11 |
| <b>Table 7S.</b>   | Selected parameter of the 3(5) substituted pyrazole structures with carbonyl (amide/ester) as substituent                                                                   | 12 |
| <b>Figure 1S.</b>  | Tautomers and conformers of the studied molecules calculated <i>in vacuo</i> .                                                                                              | 14 |
| <b>Figure 2S.</b>  | The change of relative energy (kcal/mol) for the structures (see Table 3) of the studied compounds <b>1-3</b> .                                                             | 15 |
| <b>Figure 3S.</b>  | <sup>1</sup> H NMR spectrum of <i>N</i> -methyl 5-methyl-1H-pyrazole-3-carboxylamide ( <b>1a</b> ) in CDCl <sub>3</sub> .                                                   | 16 |
| <b>Figure 4S.</b>  | <sup>1</sup> H NMR spectrum of <i>N</i> -methyl 5-methyl-1H-pyrazole-3-carboxylamide ( <b>1a</b> ) in DMSO-d <sub>6</sub> .                                                 | 16 |
| <b>Figure 5S.</b>  | <sup>1</sup> H NMR spectrum of <i>N</i> -methyl 5-methyl-1H-pyrazole-3-carboxylamide ( <b>1a</b> ) in CD <sub>3</sub> OD.                                                   | 17 |
| <b>Figure 6S.</b>  | NOE spectrum of <i>N</i> -methyl 5-methyl-1H-pyrazole-3-carboxylamide ( <b>1a</b> ) in DMSO-d <sub>6</sub> .                                                                | 17 |
| <b>Figure 7S.</b>  | NOE spectrum of <i>N</i> -methyl 5-methyl-1H-pyrazole-3-carboxylamide ( <b>1a</b> ) in DMSO-d <sub>6</sub> .                                                                | 18 |
| <b>Figure 8S.</b>  | <sup>1</sup> H NMR spectrum of ethyl 5-methyl-1H-pyrazole-3-carboxylate ( <b>1b</b> ) in CDCl <sub>3</sub> .                                                                | 18 |
| <b>Figure 9S.</b>  | <sup>1</sup> H NMR spectrum of ethyl 5-methyl-1H-pyrazole-3-carboxylate ( <b>1b</b> ) in DMSO-d <sub>6</sub> .                                                              | 19 |
| <b>Figure 10S.</b> | <sup>1</sup> H NMR spectrum of ethyl 5-methyl-1H-pyrazole-3-carboxylate ( <b>1b</b> ) in MeOD.                                                                              | 19 |
| <b>Figure 11S.</b> | NOE spectrum of ethyl 5-methyl-1H-pyrazole-3-carboxylate ( <b>1b</b> ) in DMSO-d <sub>6</sub> .                                                                             | 20 |
| <b>Figure 12S.</b> | NOE spectrum of ethyl 5-methyl-1H-pyrazole-3-carboxylate ( <b>1b</b> ) in DMSO-d <sub>6</sub> .                                                                             | 20 |
| <b>Figure 13S.</b> | <sup>1</sup> H NMR spectrum of methyl 5(3)-amino-1H-pyrazole-3(5)-carboxylate ( <b>2b</b> ) in CDCl <sub>3</sub> .                                                          | 21 |
| <b>Figure 14S.</b> | <sup>1</sup> H NMR spectrum of methyl 5(3)-amino-1H-pyrazole-3(5)-carboxylate ( <b>2b</b> ) in DMSO-d <sub>6</sub> .                                                        | 21 |
| <b>Figure 15S.</b> | <sup>13</sup> C NMR spectrum of methyl 5(3)-amino-1H-pyrazole-3(5)-carboxylate ( <b>2b</b> ) in DMSO-d <sub>6</sub> .                                                       | 22 |
| <b>Figure 16S.</b> | <sup>1</sup> H NMR spectrum of methyl 5(3)-amino-1H-pyrazole-3(5)-carboxylate ( <b>2b</b> ) in CD <sub>3</sub> OD.                                                          | 22 |
| <b>Figure 17S.</b> | NOE spectrum of methyl 5(3)-amino-1H-pyrazole-3(5)-carboxylate ( <b>2b</b> ) in DMSO-d <sub>6</sub> .                                                                       | 23 |
| <b>Figure 18S.</b> | <sup>1</sup> H NMR spectrum of methyl 3-nitro-1H-pyrazole-5-carboxylate ( <b>3b</b> ) in CDCl <sub>3</sub> .                                                                | 23 |
| <b>Figure 19S.</b> | <sup>1</sup> H NMR spectrum of methyl 3-nitro-1H-pyrazole-5-carboxylate ( <b>3b</b> ) in DMSO-d <sub>6</sub> .                                                              | 24 |
| <b>Figure 20S.</b> | <sup>1</sup> H NMR spectrum of methyl 3-nitro-1H-pyrazole-5-carboxylate ( <b>3b</b> ) in CD <sub>3</sub> OD.                                                                | 24 |
| <b>Figure 21S.</b> | NOE spectrum of methyl 3-nitro-1H-pyrazole-5-carboxylate ( <b>3b</b> ) in DMSO-d <sub>6</sub> .                                                                             | 25 |
| <b>Figure 22S.</b> | DSC of ethyl 5-methyl-1H-pyrazole-3-carboxylate ( <b>1b</b> )                                                                                                               | 26 |
| <b>Figure 23S.</b> | DSC of methyl 5(3)-amino-1H-pyrazole-3(5)-carboxylate ( <b>2b</b> )                                                                                                         | 27 |
| <b>Figure 24S.</b> | DSC of methyl 3-nitro-1H-pyrazole-5-carboxylate ( <b>3b</b> )                                                                                                               | 28 |

## Supplementary Materials

**Table 1S.** Selected geometric parameters for *N*-Methyl 5-methyl-1H-pyrazole-3-carboxamide (**1a**)  
CH<sub>3</sub>-Pz-CONHCH<sub>3</sub> (Å, °)

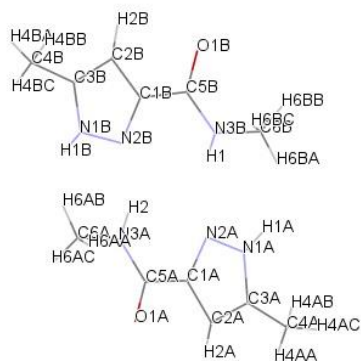

|             |             |               |             |
|-------------|-------------|---------------|-------------|
| N1A—C3A     | 1.3512 (19) | C2B—C3B       | 1.375 (2)   |
| N1A—N2A     | 1.3515 (17) | C2B—H2B       | 0.9300      |
| N1A—H1A     | 0.8600      | C4A—H4AA      | 0.9600      |
| O1A—C5A     | 1.2424 (17) | C4A—H4AB      | 0.9600      |
| C1A—N2A     | 1.3438 (18) | C4A—H4AC      | 0.9600      |
| C1A—C2A     | 1.3952 (19) | C3B—C4B       | 1.490 (2)   |
| C1A—C5A     | 1.477 (2)   | N3B—C5B       | 1.3367 (19) |
| N1B—C3B     | 1.3484 (19) | N3B—C6B       | 1.4556 (18) |
| N1B—N2B     | 1.3505 (16) | N3B—H1        | 0.8600      |
| N1B—H1B     | 0.8600      | C4B—H4BA      | 0.9600      |
| O1B—C5B     | 1.2395 (16) | C4B—H4BB      | 0.9600      |
| C1B—N2B     | 1.3438 (17) | C4B—H4BC      | 0.9600      |
| C1B—C2B     | 1.395 (2)   | C6A—H6AA      | 0.9600      |
| C1B—C5B     | 1.4817 (19) | C6A—H6AB      | 0.9600      |
| C3A—C2A     | 1.374 (2)   | C6A—H6AC      | 0.9600      |
| C3A—C4A     | 1.494 (2)   | C6B—H6BA      | 0.9600      |
| N3A—C5A     | 1.3287 (18) | C6B—H6BB      | 0.9600      |
| N3A—C6A     | 1.4510 (18) | C6B—H6BC      | 0.9600      |
| N3A—H2      | 0.8600      | C2A—H2A       | 0.9300      |
| C3A—N1A—N2A | 113.48 (12) | C2B—C3B—C4B   | 132.29 (14) |
| C3A—N1A—H1A | 123.3       | C5B—N3B—C6B   | 120.93 (12) |
| N2A—N1A—H1A | 123.3       | C5B—N3B—H1    | 119.5       |
| N2A—C1A—C2A | 111.91 (13) | C6B—N3B—H1    | 119.5       |
| N2A—C1A—C5A | 121.72 (13) | O1A—C5A—N3A   | 122.62 (13) |
| C2A—C1A—C5A | 126.35 (13) | O1A—C5A—C1A   | 119.47 (13) |
| C1A—N2A—N1A | 103.33 (12) | N3A—C5A—C1A   | 117.90 (12) |
| C3B—N1B—N2B | 113.51 (11) | C3B—C4B—H4BA  | 109.5       |
| C3B—N1B—H1B | 123.2       | C3B—C4B—H4BB  | 109.5       |
| N2B—N1B—H1B | 123.2       | H4BA—C4B—H4BB | 109.5       |
| N2B—C1B—C2B | 111.55 (12) | C3B—C4B—H4BC  | 109.5       |
| N2B—C1B—C5B | 121.71 (13) | H4BA—C4B—H4BC | 109.5       |
| C2B—C1B—C5B | 126.74 (13) | H4BB—C4B—H4BC | 109.5       |
| N1A—C3A—C2A | 105.99 (13) | N3A—C6A—H6AA  | 109.5       |
| N1A—C3A—C4A | 121.81 (14) | N3A—C6A—H6AB  | 109.5       |
| C2A—C3A—C4A | 132.19 (14) | H6AA—C6A—H6AB | 109.5       |

## Supplementary Materials

|                 |              |                 |              |
|-----------------|--------------|-----------------|--------------|
| C5A—N3A—C6A     | 120.94 (12)  | N3A—C6A—H6AC    | 109.5        |
| C5A—N3A—H2      | 119.5        | H6AA—C6A—H6AC   | 109.5        |
| C6A—N3A—H2      | 119.5        | H6AB—C6A—H6AC   | 109.5        |
| C1B—N2B—N1B     | 103.58 (11)  | N3B—C6B—H6BA    | 109.5        |
| C3B—C2B—C1B     | 105.48 (13)  | N3B—C6B—H6BB    | 109.5        |
| C3B—C2B—H2B     | 127.3        | H6BA—C6B—H6BB   | 109.5        |
| C1B—C2B—H2B     | 127.3        | N3B—C6B—H6BC    | 109.5        |
| C3A—C4A—H4AA    | 109.5        | H6BA—C6B—H6BC   | 109.5        |
| C3A—C4A—H4AB    | 109.5        | H6BB—C6B—H6BC   | 109.5        |
| H4AA—C4A—H4AB   | 109.5        | O1B—C5B—N3B     | 123.08 (13)  |
| C3A—C4A—H4AC    | 109.5        | O1B—C5B—C1B     | 120.03 (13)  |
| H4AA—C4A—H4AC   | 109.5        | N3B—C5B—C1B     | 116.89 (12)  |
| H4AB—C4A—H4AC   | 109.5        | C3A—C2A—C1A     | 105.28 (13)  |
| N1B—C3B—C2B     | 105.88 (12)  | C3A—C2A—H2A     | 127.4        |
| N1B—C3B—C4B     | 121.83 (13)  | C1A—C2A—H2A     | 127.4        |
| C2A—C1A—N2A—N1A | 0.16 (15)    | C6A—N3A—C5A—C1A | -178.40 (12) |
| C5A—C1A—N2A—N1A | -178.50 (12) | N2A—C1A—C5A—O1A | 165.29 (13)  |
| C3A—N1A—N2A—C1A | -0.35 (15)   | C2A—C1A—C5A—O1A | -13.2 (2)    |
| N2A—N1A—C3A—C2A | 0.41 (16)    | N2A—C1A—C5A—N3A | -15.4 (2)    |
| N2A—N1A—C3A—C4A | 179.69 (13)  | C2A—C1A—C5A—N3A | 166.12 (13)  |
| C2B—C1B—N2B—N1B | -0.13 (15)   | C6B—N3B—C5B—O1B | -2.0 (2)     |
| C5B—C1B—N2B—N1B | 178.95 (12)  | C6B—N3B—C5B—C1B | 178.53 (13)  |
| C3B—N1B—N2B—C1B | -0.21 (15)   | N2B—C1B—C5B—O1B | 165.12 (13)  |
| N2B—C1B—C2B—C3B | 0.40 (16)    | C2B—C1B—C5B—O1B | -16.0 (2)    |
| C5B—C1B—C2B—C3B | -178.62 (13) | N2B—C1B—C5B—N3B | -15.4 (2)    |
| N2B—N1B—C3B—C2B | 0.46 (16)    | C2B—C1B—C5B—N3B | 163.51 (13)  |
| N2B—N1B—C3B—C4B | -179.12 (12) | N1A—C3A—C2A—C1A | -0.28 (15)   |
| C1B—C2B—C3B—N1B | -0.49 (15)   | C4A—C3A—C2A—C1A | -179.45 (15) |
| C1B—C2B—C3B—C4B | 179.02 (15)  | N2A—C1A—C2A—C3A | 0.08 (16)    |
| C6A—N3A—C5A—O1A | 0.9 (2)      | C5A—C1A—C2A—C3A | 178.66 (13)  |

## Supplementary Materials

**Table 2S.** Selected geometric parameters for ethyl 5-methyl-1H-pyrazole-3-carboxylate (**1b**) CH<sub>3</sub>-Pz-COOCH<sub>2</sub>CH<sub>3</sub> (Å, °)

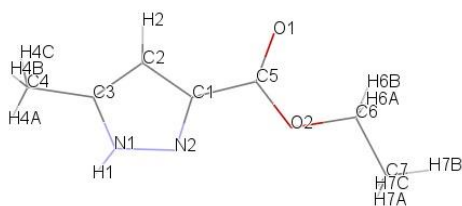

|             |              |             |              |
|-------------|--------------|-------------|--------------|
| N1—N2       | 1.3458 (17)  | C3—C4       | 1.491 (2)    |
| N1—C3       | 1.3512 (19)  | C4—H4A      | 0.9600       |
| N1—H1       | 0.8600       | C4—H4B      | 0.9600       |
| N2—C1       | 1.3423 (18)  | C4—H4C      | 0.9600       |
| O1—C5       | 1.2087 (18)  | C6—C7       | 1.501 (2)    |
| O2—C5       | 1.3399 (18)  | C6—H6A      | 0.9700       |
| O2—C6       | 1.4578 (18)  | C6—H6B      | 0.9700       |
| C1—C2       | 1.400 (2)    | C7—H7A      | 0.9600       |
| C1—C5       | 1.475 (2)    | C7—H7B      | 0.9600       |
| C2—C3       | 1.377 (2)    | C7—H7C      | 0.9600       |
| C2—H2       | 0.9300       |             |              |
| N2—N1—C3    | 113.56 (12)  | H4A—C4—H4C  | 109.5        |
| N2—N1—H1    | 123.2        | H4B—C4—H4C  | 109.5        |
| C3—N1—H1    | 123.2        | O1—C5—O2    | 124.52 (14)  |
| C1—N2—N1    | 103.78 (12)  | O1—C5—C1    | 123.77 (14)  |
| C5—O2—C6    | 116.16 (11)  | O2—C5—C1    | 111.70 (12)  |
| N2—C1—C2    | 111.54 (13)  | O2—C6—C7    | 107.29 (12)  |
| N2—C1—C5    | 120.39 (13)  | O2—C6—H6A   | 110.3        |
| C2—C1—C5    | 128.06 (13)  | C7—C6—H6A   | 110.3        |
| C3—C2—C1    | 105.25 (13)  | O2—C6—H6B   | 110.3        |
| C3—C2—H2    | 127.4        | C7—C6—H6B   | 110.3        |
| C1—C2—H2    | 127.4        | H6A—C6—H6B  | 108.5        |
| N1—C3—C2    | 105.88 (13)  | C6—C7—H7A   | 109.5        |
| N1—C3—C4    | 121.39 (13)  | C6—C7—H7B   | 109.5        |
| C2—C3—C4    | 132.73 (14)  | H7A—C7—H7B  | 109.5        |
| C3—C4—H4A   | 109.5        | C6—C7—H7C   | 109.5        |
| C3—C4—H4B   | 109.5        | H7A—C7—H7C  | 109.5        |
| H4A—C4—H4B  | 109.5        | H7B—C7—H7C  | 109.5        |
| C3—C4—H4C   | 109.5        |             |              |
| C3—N1—N2—C1 | -0.54 (16)   | C1—C2—C3—C4 | 179.66 (16)  |
| N1—N2—C1—C2 | 0.76 (16)    | C6—O2—C5—O1 | -0.2 (2)     |
| N1—N2—C1—C5 | -179.66 (12) | C6—O2—C5—C1 | -179.37 (12) |
| N2—C1—C2—C3 | -0.71 (17)   | N2—C1—C5—O1 | 175.04 (15)  |
| C5—C1—C2—C3 | 179.75 (15)  | C2—C1—C5—O1 | -5.5 (3)     |
| N2—N1—C3—C2 | 0.11 (17)    | N2—C1—C5—O2 | -5.8 (2)     |
| N2—N1—C3—C4 | -179.30 (13) | C2—C1—C5—O2 | 173.72 (14)  |
| C1—C2—C3—N1 | 0.35 (16)    | C5—O2—C6—C7 | 174.94 (12)  |

## Supplementary Materials

**Table 3S.** Selected geometric parameters for methyl 5-amino-1H-pyrazole-3-carboxylate (**2b**) H<sub>2</sub>N-Pz-COOCH<sub>3</sub> (Å, °)

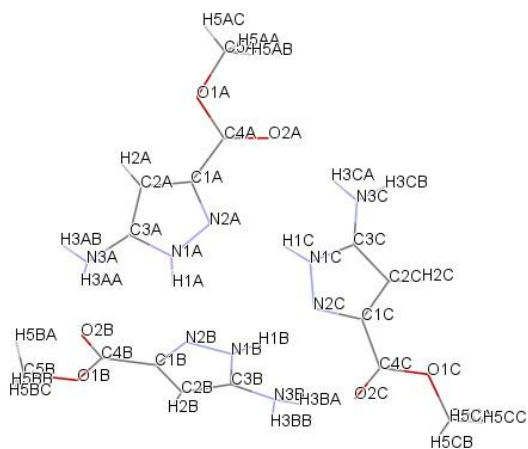

|             |             |               |             |
|-------------|-------------|---------------|-------------|
| C1C—N2C     | 1.3351 (19) | N1B—C3B       | 1.3503 (19) |
| C1C—C2C     | 1.399 (2)   | N1B—N2B       | 1.3524 (17) |
| C1C—C4C     | 1.475 (2)   | N1B—H1B       | 0.8600      |
| C2C—C3C     | 1.384 (2)   | O1B—C4B       | 1.3386 (18) |
| C2C—H2C     | 0.9300      | O1B—C5B       | 1.4452 (18) |
| C3C—N1C     | 1.3537 (19) | C1B—N2B       | 1.3411 (19) |
| C3C—N3C     | 1.370 (2)   | C1B—C2B       | 1.402 (2)   |
| C4C—O2C     | 1.2191 (18) | C1B—C4B       | 1.473 (2)   |
| C4C—O1C     | 1.3368 (18) | N3A—C3A       | 1.378 (2)   |
| C5C—O1C     | 1.4493 (18) | N3A—H3AB      | 0.895 (17)  |
| C5C—H5CA    | 0.9600      | N3A—H3AA      | 0.877 (18)  |
| C5C—H5CB    | 0.9600      | N3B—C3B       | 1.387 (2)   |
| C5C—H5CC    | 0.9600      | N3B—H3BA      | 0.892 (18)  |
| N1A—C3A     | 1.3562 (19) | N3B—H3BB      | 0.880 (18)  |
| N1A—N2A     | 1.3582 (17) | C3B—C2B       | 1.379 (2)   |
| N1A—H1A     | 0.8600      | N3C—H3CA      | 0.906 (18)  |
| O1A—C4A     | 1.3381 (18) | N3C—H3CB      | 0.856 (18)  |
| O1A—C5A     | 1.4459 (18) | C4B—O2B       | 1.2131 (18) |
| C1A—N2A     | 1.3389 (19) | C5B—H5BA      | 0.9600      |
| C1A—C2A     | 1.400 (2)   | C5B—H5BB      | 0.9600      |
| C1A—C4A     | 1.476 (2)   | C5B—H5BC      | 0.9600      |
| O2A—C4A     | 1.2139 (18) | C5A—H5AA      | 0.9600      |
| C2A—C3A     | 1.374 (2)   | C5A—H5AB      | 0.9600      |
| C2A—H2A     | 0.9300      | C5A—H5AC      | 0.9600      |
| N1C—N2C     | 1.3629 (17) | C2B—H2B       | 0.9300      |
| N1C—H1C     | 0.8600      |               |             |
| N2C—C1C—C2C | 112.41 (14) | C2B—C1B—C4B   | 129.00 (14) |
| N2C—C1C—C4C | 118.92 (13) | C3A—N3A—H3AB  | 114.3 (11)  |
| C2C—C1C—C4C | 128.66 (14) | C3A—N3A—H3AA  | 115.6 (11)  |
| C3C—C2C—C1C | 104.68 (13) | H3AB—N3A—H3AA | 115.7 (15)  |
| C3C—C2C—H2C | 127.7       | N1A—C3A—C2A   | 106.98 (13) |

## Supplementary Materials

|                 |              |                 |              |
|-----------------|--------------|-----------------|--------------|
| C1C—C2C—H2C     | 127.7        | N1A—C3A—N3A     | 121.33 (14)  |
| N1C—C3C—N3C     | 121.78 (14)  | C2A—C3A—N3A     | 131.52 (15)  |
| N1C—C3C—C2C     | 106.44 (13)  | C1C—N2C—N1C     | 103.77 (12)  |
| N3C—C3C—C2C     | 131.54 (15)  | C3B—N3B—H3BA    | 113.5 (11)   |
| O2C—C4C—O1C     | 123.72 (15)  | C3B—N3B—H3BB    | 113.8 (11)   |
| O2C—C4C—C1C     | 125.03 (14)  | H3BA—N3B—H3BB   | 110.2 (16)   |
| O1C—C4C—C1C     | 111.25 (13)  | N1B—C3B—C2B     | 106.73 (14)  |
| O1C—C5C—H5CA    | 109.5        | N1B—C3B—N3B     | 120.63 (14)  |
| O1C—C5C—H5CB    | 109.5        | C2B—C3B—N3B     | 132.55 (15)  |
| H5CA—C5C—H5CB   | 109.5        | C3C—N3C—H3CA    | 115.4 (11)   |
| O1C—C5C—H5CC    | 109.5        | C3C—N3C—H3CB    | 116.5 (12)   |
| H5CA—C5C—H5CC   | 109.5        | H3CA—N3C—H3CB   | 112.8 (16)   |
| H5CB—C5C—H5CC   | 109.5        | O2B—C4B—O1B     | 123.40 (14)  |
| C3A—N1A—N2A     | 112.41 (12)  | O2B—C4B—C1B     | 125.50 (14)  |
| C3A—N1A—H1A     | 123.8        | O1B—C4B—C1B     | 111.09 (13)  |
| N2A—N1A—H1A     | 123.8        | O2A—C4A—O1A     | 123.97 (14)  |
| C4A—O1A—C5A     | 115.06 (12)  | O2A—C4A—C1A     | 125.53 (14)  |
| N2A—C1A—C2A     | 112.38 (14)  | O1A—C4A—C1A     | 110.47 (13)  |
| N2A—C1A—C4A     | 118.68 (14)  | O1B—C5B—H5BA    | 109.5        |
| C2A—C1A—C4A     | 128.93 (14)  | O1B—C5B—H5BB    | 109.5        |
| C1A—N2A—N1A     | 103.74 (12)  | H5BA—C5B—H5BB   | 109.5        |
| C3A—C2A—C1A     | 104.49 (13)  | O1B—C5B—H5BC    | 109.5        |
| C3A—C2A—H2A     | 127.8        | H5BA—C5B—H5BC   | 109.5        |
| C1A—C2A—H2A     | 127.8        | H5BB—C5B—H5BC   | 109.5        |
| C3C—N1C—N2C     | 112.68 (13)  | O1A—C5A—H5AA    | 109.5        |
| C3C—N1C—H1C     | 123.7        | O1A—C5A—H5AB    | 109.5        |
| N2C—N1C—H1C     | 123.7        | H5AA—C5A—H5AB   | 109.5        |
| C4C—O1C—C5C     | 115.80 (12)  | O1A—C5A—H5AC    | 109.5        |
| C3B—N1B—N2B     | 112.86 (13)  | H5AA—C5A—H5AC   | 109.5        |
| C3B—N1B—H1B     | 123.6        | H5AB—C5A—H5AC   | 109.5        |
| N2B—N1B—H1B     | 123.6        | C1B—N2B—N1B     | 103.87 (12)  |
| C4B—O1B—C5B     | 115.12 (12)  | C3B—C2B—C1B     | 104.54 (14)  |
| N2B—C1B—C2B     | 111.97 (14)  | C3B—C2B—H2B     | 127.7        |
| N2B—C1B—C4B     | 118.99 (13)  | C1B—C2B—H2B     | 127.7        |
| N2C—C1C—C2C—C3C | 0.21 (17)    | C3C—N1C—N2C—C1C | -1.09 (16)   |
| C4C—C1C—C2C—C3C | -178.98 (15) | N2B—N1B—C3B—C2B | 1.16 (17)    |
| C1C—C2C—C3C—N1C | -0.85 (16)   | N2B—N1B—C3B—N3B | 178.19 (13)  |
| C1C—C2C—C3C—N3C | 173.41 (16)  | C5B—O1B—C4B—O2B | 0.6 (2)      |
| N2C—C1C—C4C—O2C | 3.8 (2)      | C5B—O1B—C4B—C1B | -178.37 (12) |
| C2C—C1C—C4C—O2C | -177.06 (15) | N2B—C1B—C4B—O2B | -3.9 (2)     |
| N2C—C1C—C4C—O1C | -175.76 (13) | C2B—C1B—C4B—O2B | 178.40 (15)  |
| C2C—C1C—C4C—O1C | 3.4 (2)      | N2B—C1B—C4B—O1B | 175.00 (13)  |
| C2A—C1A—N2A—N1A | -0.87 (16)   | C2B—C1B—C4B—O1B | -2.7 (2)     |
| C4A—C1A—N2A—N1A | -179.72 (12) | C5A—O1A—C4A—O2A | 1.0 (2)      |
| C3A—N1A—N2A—C1A | 0.51 (15)    | C5A—O1A—C4A—C1A | -177.21 (12) |
| N2A—C1A—C2A—C3A | 0.90 (17)    | N2A—C1A—C4A—O2A | -13.4 (2)    |
| C4A—C1A—C2A—C3A | 179.60 (14)  | C2A—C1A—C4A—O2A | 167.97 (15)  |

## Supplementary Materials

|                 |              |                 |              |
|-----------------|--------------|-----------------|--------------|
| N3C—C3C—N1C—N2C | -173.69 (13) | N2A—C1A—C4A—O1A | 164.82 (12)  |
| C2C—C3C—N1C—N2C | 1.25 (16)    | C2A—C1A—C4A—O1A | -13.8 (2)    |
| O2C—C4C—O1C—C5C | 2.4 (2)      | C2B—C1B—N2B—N1B | 0.84 (16)    |
| C1C—C4C—O1C—C5C | -177.99 (12) | C4B—C1B—N2B—N1B | -177.20 (12) |
| N2A—N1A—C3A—C2A | 0.03 (16)    | C3B—N1B—N2B—C1B | -1.24 (16)   |
| N2A—N1A—C3A—N3A | -175.67 (13) | N1B—C3B—C2B—C1B | -0.57 (16)   |
| C1A—C2A—C3A—N1A | -0.53 (16)   | N3B—C3B—C2B—C1B | -177.10 (16) |
| C1A—C2A—C3A—N3A | 174.56 (16)  | N2B—C1B—C2B—C3B | -0.18 (17)   |
| C2C—C1C—N2C—N1C | 0.51 (16)    | C4B—C1B—C2B—C3B | 177.61 (14)  |
| C4C—C1C—N2C—N1C | 179.78 (13)  |                 |              |

## Supplementary Materials

**Table 4S.** Selected geometric parameters for methyl 3-nitro-1H-pyrazole-5-carboxylate (**3b**) N<sub>2</sub>O-Pz-COOCH<sub>3</sub> (Å, °)

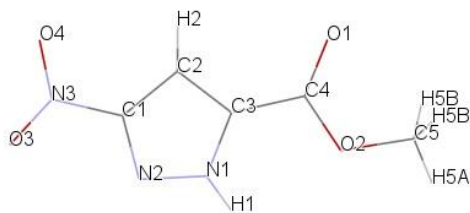

|             |             |             |             |
|-------------|-------------|-------------|-------------|
| O1—C4       | 1.2135 (19) | O2—C5       | 1.464 (2)   |
| N1—N2       | 1.3363 (19) | C2—C3       | 1.376 (2)   |
| N1—C3       | 1.360 (2)   | C2—H2       | 0.9300      |
| N1—H1       | 0.8600      | O4—N3       | 1.2279 (18) |
| C1—N2       | 1.328 (2)   | C4—C3       | 1.479 (2)   |
| C1—C2       | 1.393 (2)   | O3—N3       | 1.2233 (18) |
| C1—N3       | 1.453 (2)   | C5—H5B      | 0.997 (15)  |
| O2—C4       | 1.3226 (19) | C5—H5A      | 0.98 (2)    |
| N2—N1—C3    | 112.57 (12) | O1—C4—C3    | 123.30 (14) |
| N2—N1—H1    | 123.7       | O2—C4—C3    | 111.55 (13) |
| C3—N1—H1    | 123.7       | N1—C3—C2    | 107.37 (14) |
| N2—C1—C2    | 114.17 (14) | N1—C3—C4    | 122.70 (14) |
| N2—C1—N3    | 119.22 (14) | C2—C3—C4    | 129.93 (14) |
| C2—C1—N3    | 126.61 (15) | O3—N3—O4    | 125.44 (14) |
| C1—N2—N1    | 103.21 (12) | O3—N3—C1    | 118.22 (14) |
| C4—O2—C5    | 115.28 (12) | O4—N3—C1    | 116.34 (14) |
| C3—C2—C1    | 102.68 (13) | O2—C5—H5B   | 109.0 (8)   |
| C3—C2—H2    | 128.7       | O2—C5—H5A   | 104.4 (12)  |
| C1—C2—H2    | 128.7       | H5B—C5—H5A  | 112.3 (10)  |
| O1—C4—O2    | 125.15 (15) |             |             |
| C2—C1—N2—N1 | 0.000 (1)   | C1—C2—C3—C4 | 180.000 (1) |
| N3—C1—N2—N1 | 180.000 (1) | O1—C4—C3—N1 | 180.000 (1) |
| C3—N1—N2—C1 | 0.000 (1)   | O2—C4—C3—N1 | 0.000 (1)   |
| N2—C1—C2—C3 | 0.000 (1)   | O1—C4—C3—C2 | 0.000 (1)   |
| N3—C1—C2—C3 | 180.000 (1) | O2—C4—C3—C2 | 180.000 (1) |
| C5—O2—C4—O1 | 0.000 (1)   | N2—C1—N3—O3 | 0.000 (1)   |
| C5—O2—C4—C3 | 180.000 (1) | C2—C1—N3—O3 | 180.000 (1) |
| N2—N1—C3—C2 | 0.000 (1)   | N2—C1—N3—O4 | 180.000 (1) |
| N2—N1—C3—C4 | 180.000 (1) | C2—C1—N3—O4 | 0.000 (1)   |
| C1—C2—C3—N1 | 0.000 (1)   |             |             |



## Supplementary Materials

**Table 5S.** Selected geometric parameters for Methylammonium 3-nitro-1H-pyrazole-5-carboxylate (**4**)  $\text{N}_2\text{OPzCOO}^-\text{MeNH}_3^+$  (Å, °)

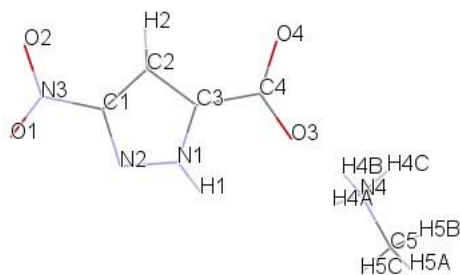

|             |              |             |              |
|-------------|--------------|-------------|--------------|
| O1—N3       | 1.2314 (13)  | C3—C4       | 1.4981 (18)  |
| C1—N2       | 1.3309 (16)  | O3—C4       | 1.2502 (16)  |
| C1—C2       | 1.3902 (18)  | C4—O4       | 1.2537 (15)  |
| C1—N3       | 1.4441 (16)  | N4—C5       | 1.4811 (16)  |
| N1—N2       | 1.3379 (15)  | N4—H4A      | 0.8900       |
| N1—C3       | 1.3568 (16)  | N4—H4B      | 0.8900       |
| N1—H1       | 0.8600       | N4—H4C      | 0.8900       |
| O2—N3       | 1.2247 (14)  | C5—H5A      | 0.9600       |
| C2—C3       | 1.3766 (18)  | C5—H5B      | 0.9600       |
| C2—H2       | 0.9300       | C5—H5C      | 0.9600       |
| N2—C1—C2    | 114.22 (11)  | O3—C4—O4    | 126.23 (12)  |
| N2—C1—N3    | 118.07 (11)  | O3—C4—C3    | 114.88 (11)  |
| C2—C1—N3    | 127.70 (12)  | O4—C4—C3    | 118.88 (12)  |
| N2—N1—C3    | 113.31 (11)  | C5—N4—H4A   | 109.5        |
| N2—N1—H1    | 123.3        | C5—N4—H4B   | 109.5        |
| C3—N1—H1    | 123.3        | H4A—N4—H4B  | 109.5        |
| C3—C2—C1    | 103.08 (12)  | C5—N4—H4C   | 109.5        |
| C3—C2—H2    | 128.5        | H4A—N4—H4C  | 109.5        |
| C1—C2—H2    | 128.5        | H4B—N4—H4C  | 109.5        |
| C1—N2—N1    | 102.63 (10)  | N4—C5—H5A   | 109.5        |
| N1—C3—C2    | 106.76 (11)  | N4—C5—H5B   | 109.5        |
| N1—C3—C4    | 119.15 (11)  | H5A—C5—H5B  | 109.5        |
| C2—C3—C4    | 134.08 (12)  | N4—C5—H5C   | 109.5        |
| O2—N3—O1    | 124.14 (11)  | H5A—C5—H5C  | 109.5        |
| O2—N3—C1    | 117.43 (11)  | H5B—C5—H5C  | 109.5        |
| O1—N3—C1    | 118.43 (11)  |             |              |
| N2—C1—C2—C3 | 0.23 (15)    | N2—C1—N3—O2 | 172.97 (11)  |
| N3—C1—C2—C3 | -178.55 (13) | C2—C1—N3—O2 | -8.3 (2)     |
| C2—C1—N2—N1 | 0.17 (14)    | N2—C1—N3—O1 | -7.09 (18)   |
| N3—C1—N2—N1 | 179.07 (11)  | C2—C1—N3—O1 | 171.64 (13)  |
| C3—N1—N2—C1 | -0.53 (14)   | N1—C3—C4—O3 | -0.02 (18)   |
| N2—N1—C3—C2 | 0.70 (15)    | C2—C3—C4—O3 | -178.86 (14) |
| N2—N1—C3—C4 | -178.43 (11) | N1—C3—C4—O4 | 179.45 (12)  |
| C1—C2—C3—N1 | -0.53 (14)   | C2—C3—C4—O4 | 0.6 (2)      |
| C1—C2—C3—C4 | 178.42 (14)  |             |              |

## Supplementary Materials

**Table 6S.** Selected hydrogen-bond parameters

| <i>D</i> —H... <i>A</i>        | <i>D</i> —H (Å) | H... <i>A</i> (Å) | <i>D</i> ... <i>A</i> (Å) | <i>D</i> —H... <i>A</i> (°) |
|--------------------------------|-----------------|-------------------|---------------------------|-----------------------------|
| <b>1a</b>                      |                 |                   |                           |                             |
| N1A—H1A...O1A <sup>i</sup>     | 0.86            | 1.90              | 2.7454 (15)               | 166.9                       |
| N1B—H1B...O1B <sup>ii</sup>    | 0.86            | 1.95              | 2.7815 (15)               | 163.1                       |
| N3A—H2...N2B                   | 0.86            | 2.20              | 3.0254 (17)               | 159.6                       |
| C4A—H4AC...O1A <sup>iii</sup>  | 0.96            | 2.51              | 3.2622 (19)               | 135.1                       |
| N3B—H1...N2A                   | 0.86            | 2.22              | 3.0532 (17)               | 164.1                       |
| C2A—H2A...N2A <sup>iv</sup>    | 0.93            | 2.65              | 3.5627 (19)               | 166.0                       |
| <b>1b</b>                      |                 |                   |                           |                             |
| C4—H4C...O1 <sup>v</sup>       | 0.96            | 2.66              | 3.5453 (19)               | 153.9                       |
| N1—H1...N2 <sup>vi</sup>       | 0.86            | 2.17              | 2.9852 (18)               | 157.2                       |
| N1—H1...O2 <sup>vi</sup>       | 0.86            | 2.48              | 3.0998 (16)               | 129.3                       |
| <b>2b</b>                      |                 |                   |                           |                             |
| C5C—H5CA...O2A <sup>vii</sup>  | 0.96            | 2.60              | 3.255 (2)                 | 125.4                       |
| N1A—H1A...N2B                  | 0.86            | 2.05              | 2.8559 (18)               | 155.2                       |
| N1C—H1C...N2A                  | 0.86            | 2.06              | 2.8957 (18)               | 165.1                       |
| N1B—H1B...N2C                  | 0.86            | 2.00              | 2.8519 (18)               | 169.5                       |
| N3A—H3AB...O2C <sup>viii</sup> | 0.895 (17)      | 2.361 (18)        | 3.1325 (18)               | 144.4 (14)                  |
| N3A—H3AA...O2B                 | 0.877 (18)      | 2.057 (19)        | 2.9198 (19)               | 167.5 (16)                  |
| N3B—H3BA...O2C                 | 0.892 (18)      | 2.126 (19)        | 3.0023 (19)               | 166.8 (16)                  |
| N3C—H3CA...O2A                 | 0.906 (18)      | 2.059 (19)        | 2.9602 (19)               | 173.0 (16)                  |
| N3C—H3CB...N3B <sup>ix</sup>   | 0.856 (18)      | 2.495 (18)        | 3.203 (2)                 | 140.6 (15)                  |
| C5A—H5AB...N3A <sup>viii</sup> | 0.96            | 2.65              | 3.511 (2)                 | 150.1                       |
| <b>3b</b>                      |                 |                   |                           |                             |
| N1—H1...O1 <sup>x</sup>        | 0.86            | 2.01              | 2.8274 (17)               | 159.0                       |
| C2—H2...N2 <sup>xi</sup>       | 0.93            | 2.35              | 3.250 (2)                 | 163.6                       |
| C5—H5A...O4 <sup>xii</sup>     | 0.98 (2)        | 2.63 (2)          | 3.563 (2)                 | 158.9 (16)                  |
| <b>4</b>                       |                 |                   |                           |                             |
| N1—H1...O3 <sup>xiii</sup>     | 0.86            | 2.54              | 3.0467 (14)               | 118.5                       |
| N1—H1...O4 <sup>xiii</sup>     | 0.86            | 2.08              | 2.9340 (15)               | 175.1                       |
| C2—H2...O2 <sup>xiv</sup>      | 0.93            | 2.53              | 3.3703 (16)               | 151.2                       |
| N4—H4A...O4 <sup>xv</sup>      | 0.89            | 1.96              | 2.8146 (15)               | 160.6                       |
| N4—H4B...O3                    | 0.89            | 1.85              | 2.7299 (14)               | 167.8                       |
| N4—H4C...N2 <sup>xvi</sup>     | 0.89            | 2.22              | 3.0874 (16)               | 166.3                       |

Symmetry code(s): (i)  $x, -y+1/2, z+1/2$ ; (ii)  $x, y-1, z$ ; (iii)  $-x+1, y+1/2, -z+1/2$ ; (iv)  $-x+1, y-1/2, -z+1/2$ ; (v)  $-x+1/2, y+1/2, -z+1/2$ ; (vi)  $-x+3/2, y+1/2, -z+1/2$ ; (vii)  $-x+1/2, y+1/2, -z+3/2$ ; (viii)  $-x+3/2, y-1/2, -z+3/2$ ; (ix)  $-x+1/2, y-1/2, -z+3/2$ ; (x)  $x-1, y, z$ ; (xi)  $x+1, y, z$ ; (xii)  $x, y, z+1$ ; (xiii)  $x-1/2, -y+3/2, z-1/2$ ; (xiv)  $-x+1, -y+1, -z+1$ ; (xv)  $x+1/2, -y+3/2, z-1/2$ ; (xvi)  $x+3/2, -y+3/2, z+1/2$ .

## Supplementary Materials

**Table 7S.** Selected parameter of the 3(5) substituted pyrazole structures with carbonyl (amide/ester) as substituent

| Refcode | Tautomer |    | Substituent position |         | Conformer |         |     | References                                                                                                                                             | Compound name                                                              |
|---------|----------|----|----------------------|---------|-----------|---------|-----|--------------------------------------------------------------------------------------------------------------------------------------------------------|----------------------------------------------------------------------------|
|         | T3       | T5 | C-3                  | C-5     | cis       | trans   |     |                                                                                                                                                        |                                                                            |
| ANIKIT  | 3        |    | Me-                  | CONHN-  | -9.22     |         | T3c | K.Karrouchi, Y.Ramli, J.Taoufik, S.Radi, M.Ansar, J.T.Mague Unknown (2016), 1, x160793                                                                 | (Z)-5-Methyl-N'-(4-methylbenzylidene)-1H-pyrazole-3-carbohydrazide         |
| EZIYES  | 3        |    | Me-                  | CONHN-  | -9.30     |         | T3c | S.K.Seth, N.C.Saha, S.Ghosh, T.Kar Chem.Phys.Lett. (2011), 506, 309                                                                                    | 5-Methyl-1H-pyrazole-3-carbohydrazide monohydrate                          |
| RISHEH  | 3        |    | Me-                  | CONHCH2 | -11.78    |         | T3c | Jing Hu, Guofeng Chen, Guochun Ma, Hongguang Song Acta Crystallogr.,Sect.E:Struct.Rep.Online (2007), 63, o4806                                         | 5,5'-Dimethyl-N,N'-(iminodiethylene)di-1H-pyrazole-3-carboxamide           |
| VEYQIB  | 3        |    | Me-                  | CONHN-  | 3.24      |         | T3c | S.Konar, A.Jana, K.Das, S.Ray, S.Chatterjee, S.K.Kar S.Konar, A.Jana, K.Das, S.Ray, S.Chatterjee, S.K.Kar                                              | Methyl(((5-methyl-1H-pyrazol-3-yl)carbonyl)hydrazono)(phenyl)acetate       |
| VUXQEM  | 3        |    | Me-                  | CONHN-  | -5.50     |         | T3c | K.Karrouchi, M.Ansar, S.Radi, M.Saadi, L.El Ammari Acta Cryst. E (2015), 71, o890                                                                      | N'-(Diphenylmethylene)-5-methyl-1H-pyrazole-3-carbohydrazide               |
| FAQSAR  | 3        |    | Me-                  | COOEt   | 5.45      |         | T3c | L.Infantes, C.Foces-Foces, R.M.Claramunt, C.Lopez, N.Jagerovic, J.Elguero Heterocycles (1999), 50, 227                                                 | 3-Ethoxycarbonyl-5-methylpyrazole                                          |
| MUXMIC  | 3        |    | H-                   | CONHPh  | 9.40      |         | T3c | M.Kissane, S.E.Lawrence, A.R.Maguire M.Kissane, S.E.Lawrence, A.R.Maguire                                                                              | N-(4-Methylphenyl)-1H-pyrazole-3-carboxamide                               |
| NIJCOZ  | 3        |    | H-                   | CONHtBu | 1.88      |         | T3c | R.M.Claramunt, M.A.Garcia, C.Lopez, S.Trofimenko, G.P.A.Yap, I.Akorta, J.Elguero Magn.Reson.Chem. (2005), 43, 89                                       | 1H-Pyrazole-3-(N-t-butyl)carboxamide                                       |
| FAQROE  | 3        |    | H-                   | COOEt   |           | 179.40  | T3t | L.Infantes, C.Foces-Foces, R.M.Claramunt, C.Lopez, N.Jagerovic, J.Elguero Heterocycles (1999), 50, 227                                                 | 3-Ethoxycarbonylpyrazole                                                   |
| RUNJIV  | 3        |    | H-                   | CONH2   |           | -167.29 | T3t | T.T.Talele, F.R.Fronczek Private Communication (2015), ,                                                                                               | 1H-pyrazole-3-carboxamide                                                  |
| RUNJER  | 3        |    | H-                   | COOMe   |           | -178.99 | T3t | T.T.Talele, F.R.Fronczek Private Communication (2015), ,                                                                                               | methyl 1H-pyrazole-3-carboxylate                                           |
| AFEQOS  | 3        |    | Ph-                  | COOH    | -8.95     |         | T3c | Xiao-Yuan Zhang, Wei Liu, Wei Tang, Yue-Bo Lai Acta Crystallogr.,Sect.E:Struct.Rep.Online (2007), 63, o3764                                            | 5-Phenyl-1H-pyrazole-3-carboxylic acid                                     |
| EMUNEH  | 3        |    | Ph-                  | CONHN-  | -7.27     |         | T3c | K.Karrouchi, Y.Ramli, J.Taoufik, S.Radi, M.Ansar, J.T.Mague Unknown (2016), 1, x160830                                                                 | N'-[(1E)-(4-bromophenyl)methylidene]-5-phenyl-1H-pyrazole-3-carbohydrazide |
| FAQSIZ  | 3        |    | Ph-                  | COOEt   | 0.96      |         | T3c | L.Infantes, C.Foces-Foces, R.M.Claramunt, C.Lopez, N.Jagerovic, J.Elguero Heterocycles (1999), 50, 227                                                 | 3-Ethoxycarbonyl-5-phenylpyrazole                                          |
| LEPRII  | 3        |    | Ph-                  | CONHN-  | -29.63    |         | T3c | Fang-Fang Jian, Tong-Ling liang, Ying-Qi Qin, Huan-Qing Yu, Hai-Lian Xiao Acta Crystallogr.,Sect.E:Struct.Rep.Online (2006), 62, o4364                 | 2'-(4-Methylbenzylidene)-5-phenyl-1H-pyrazole-3-carbohydrazide             |
| MIRYUI  | 3        |    | Ph-                  | CONHN-  | 0.19      |         | T3c | Yongqi Qin, Fangfang Jian, Hailian Xiao, Jing Zhang Acta Crystallogr.,Sect.E:Struct.Rep.Online (2008), 64, o320                                        | (E)-5-Phenyl-N'-(1-phenylethylidene)-1H-pyrazole-3-carbohydrazide          |
| QAJKUK  | 3        |    | Ph-                  | CONHN-  | -12.14    |         | T3c | K.Karrouchi, S.Radi, M.Ansar, J.Taoufik, H.A.Ghabbour, Y.N.Mabkhot Z.Kristallogr.-New Cryst.Struct. (2016), 231,                                       | N'-(4-Nitrobenzylidene)-5-phenyl-1H-pyrazole-3-carbohydrazide              |
| SEZDUX  | 3        |    | Ph-                  | CONHBz  | -7.88     |         | T3c | Yan-Qing Ge, Yong Xia, Fang Wei, Wen-Liang Dong, Bao-Xiang Zhao Acta Crystallogr.,Sect.E:Struct.Rep.Online (2007), 63, o1186                           | N-Benzyl-5-phenyl-1H-pyrazole-3-carboxamide                                |
| UJODII  | 3        |    | Ph-                  | CONHN-  | 21.58     |         | T3c | K.Karrouchi, S.Radi, M.Ansar, J.Taoufik, H.A.Ghabbour, Y.N.Mabkhot Z.Kristallogr.-New Cryst.Struct. (2016), 231,                                       | N'-(4-(Dimethylamino)benzylidene)-5-phenyl-1H-pyrazole-3-carbohydrazide    |
| HUPDAY  | 3        |    | 4-Me-OPh-            | CONHN-  | 12.43     |         | T3c | Yue An, Pingping Mu, Zhiping Guo, Yongheng Xing, Guanghua Zhou, Jun Ning, Jianzhou Lu, Jiehan Hu Youji Huaxue(Chin.)(Chin.J.Org.Chem.) (2009), 29, 730 | N'-(4-Methoxybenzylidene)-5-(4-methoxyphenyl)-1H-pyrazole-3-carbohydrazide |
| LAQNOI  | 3        |    | 4-Me-OPh-            | CONH-   | -2.50     |         | T3c | Guangqian Han, Jiaguo Lv, Ju Zhu, Youjun Zhou, Defeng Wu Acta Crystallogr.,Sect.E:Struct.Rep.Online (2012), 68, o901                                   | N-(2-Hydroxyethyl)-5-(4-methoxyphenyl)-1H-pyrazole-3-carboxamide           |

## Supplementary Materials

|          |   |   |               |        |         |         |     |                                                                                                                                                  |                                                                                                                      |
|----------|---|---|---------------|--------|---------|---------|-----|--------------------------------------------------------------------------------------------------------------------------------------------------|----------------------------------------------------------------------------------------------------------------------|
| VACYUW   | 3 |   | 4-Me-OPh-     | CONHN- | 28.07   |         | T3c | K.Karrouchi, S.Radi, M.Ansar, J.Taufik, H.A.Ghabbour, Y.N.Mabkhot Z.Kristallogr.-New Cryst.Struct. (2016), 231,                                  | N'-(4-Methoxybenzylidene)-5-phenyl-1H-pyrazole-3-carbohydrazide                                                      |
| GINPOJ   | 3 |   | Ph-           | COOMe  | 3.94    |         | T3c | Guanghua Zhou, Yue An, Jing Han, Maofa Ge, Yongheng Xing Acta Crystallogr.,Sect.E:Struct.Rep.Online (2007), 63, o4474                            | Methyl 5-phenyl-1H-pyrazole-3-carboxylate                                                                            |
| RIXVOK   | 3 |   | 4-Me-Ph-      | COOEt  | -11.37  |         | T3c | T.T.Dang, T.T.Dang, C.Fischer, H.Gorls, P.Langer Tetrahedron (2008), 64, 2207                                                                    | Ethyl 5-(4-tolyl)-1H-pyrazole-3-carboxylate                                                                          |
| TORTOL   | 3 |   | 4-F-Ph-       | COOEt  | 7.28    |         | T3c | V.Markovic, M.D.Jokovic Green Chemistry (2015), 17, 842                                                                                          | Ethyl 5-(4-fluorophenyl)-1H-pyrazole-3-carboxylate                                                                   |
| FAQSIZ   | 3 |   | Ph-           | COOEt  |         | -156.83 | T3t | L.Infantes, C.Foces-Foces, R.M.Claramunt, C.Lopez, N.Jagerovic, J.Elguero Heterocycles (1999), 50, 227                                           | 3-Ethoxycarbonyl-5-phenylpyrazole                                                                                    |
| LOBKEU   |   | 5 | 4-Me-OPh-     | COOEt  | 11.57   |         | T5c | Nana Shao, Tong Chen, Taotao Zhang, Huajian Zhu, Qunxiong Zheng, Hongbin Zou Tetrahedron (2014), 70, 795                                         | Ethyl 3-(4-methoxyphenyl)-1H-pyrazole-5-carboxylate                                                                  |
| SEZNAN   |   | 5 | 2-OH-5-Me-Ph- | COOEt  | 0.78    |         | T5c | Yan-Qing Ge, Wen-Liang Dong, Yong Xia, Fang Wei, Bao-Xiang Zhao Acta Crystallogr.,Sect.E:Struct.Rep.Online (2007), 63, o1313                     | Ethyl 3-(2-hydroxy-5-methylphenyl)-1H-pyrazole-5-carboxylate                                                         |
| VOJZEB   |   | 5 | 4-Br-Ph-      | CONHN- | -4.16   |         | T5c | Juan Sun, Peng-Cheng Lv, Yong Yin, Rong-Ju Yuan, Jian Ma, Hai-Liang Zhu Unknown (2013), 8, e69751                                                | 3-(4-bromophenyl)-N'-(2-chlorobenzoyl)-1H-pyrazole-5-carbohydrazide                                                  |
| HUPDEC   |   | 5 | 4-MeO-Ph-     | CONHN- | -155.04 |         | T5t | Yue An, Pingping Mu, Zhiping Guo, Yongheng Xing, Guanghua Zhou, Jun Ning, Jianzhou Lu, Jiehan Hu Youji Huaxuet(Chin.J.Org.Chem.) (2009), 29, 730 | N'-(4-Hydroxy-3-methoxybenzylidene)-3-(4-methoxyphenyl)-1H-pyrazole-5-carbohydrazide                                 |
| UKUVUS   |   | 5 | Ph-           | COC=C  |         | 162.16  | T5t | V.V.Khlurina, Yu.V.Shklyae, Z.A.Aliev, A.N.Maslivets Zh.Org.Khim.(Russ.J.Org.Chem.) (2009), 45, 1535                                             | 2-(8,8-Dimethyl-2,3,8,9-tetrahydro[1,4]dioxino[2,3-g]isoquinolin-6(7H)-ylidene)-1-(3-phenyl-1H-pyrazol-5-yl)ethanone |
| EWAHUH   | 3 |   | COO-          | COOH   | -7.40   |         | T3c | S.Packiaraj, A.Pushpaveni, S.Govindarajan, J.M.Rawson CrystEngComm (2016), 18, 7978                                                              | guanidinium 3-carboxy-1H-pyrazole-5-carboxylate monohydrate                                                          |
| LIGKIX   | 3 |   | COO-          | COOH   | 3.99    |         | T3c | O.Ugono, N.P.Rath, A.M.Beatty CrystEngComm (2011), 13, 753                                                                                       | N,N,N',N'-Tetramethylethane-1,2-diaminium bis(3-carboxy-1H-pyrazole-5-carboxylate)                                   |
| LIGKOD   | 3 |   | COO-          | COOH   | -5.58   |         | T3c | O.Ugono, N.P.Rath, A.M.Beatty CrystEngComm (2011), 13, 753                                                                                       | 1,4-bis(2-Hydroxyethyl)piperazinedium bis(3-carboxy-1H-pyrazole-5-carboxylate)                                       |
| LIGKUJ   | 3 |   | COO-          | COOH   | -4.45   |         | T3c | O.Ugono, N.P.Rath, A.M.Beatty CrystEngComm (2011), 13, 753                                                                                       | 2-Isopropylanilinium 3-carboxy-1H-pyrazole-5-carboxylate                                                             |
| LIGLIY   | 3 |   | COO-          | COOH   | 0.61    |         | T3c | O.Ugono, N.P.Rath, A.M.Beatty CrystEngComm (2011), 13, 753                                                                                       | 2-Ethoxyanilinium 3-carboxy-1H-pyrazole-5-carboxylate                                                                |
| MUPDOR   | 3 |   | COO-          | COOH   | -6.57   |         | T3c | O.Ugono, N.P.Rath, A.M.Beatty Cryst.Growth Des. (2009), 9, 4595                                                                                  | 2-Phenoxyanilinium 3-carboxy-1H-pyrazole-5-carboxylate                                                               |
| QUCRUC   | 3 |   | COO-          | COOH   | 13.84   |         | T3c | O.Ugono, N.P.Rath, A.M.Beatty Cryst.Growth Des. (2009), 9, 4595                                                                                  | 2-(4-Methoxyphenyl)ethanaminium 3-carboxy-1H-pyrazole-5-carboxylate                                                  |
| QUCSAJ   | 3 |   | COO-          | COOH   | -16.02  |         | T3c | O.Ugono, N.P.Rath, A.M.Beatty Cryst.Growth Des. (2009), 9, 4595                                                                                  | 2-(4-Methylphenyl)ethanaminium 3-carboxy-1H-pyrazole-5-carboxylate                                                   |
| QUCSEN   | 3 |   | COO-          | COOH   | 18.77   |         | T3c | O.Ugono, N.P.Rath, A.M.Beatty Cryst.Growth Des. (2009), 9, 4595                                                                                  | 2-(4-Fluorophenyl)ethanaminium 3-carboxy-1H-pyrazole-5-carboxylate                                                   |
| QUCSIR   | 3 |   | COO-          | COOH   | 10.23   |         | T3c | O.Ugono, N.P.Rath, A.M.Beatty Cryst.Growth Des. (2009), 9, 4595                                                                                  | 1-(1-Naphthyl)ethanaminium 3-carboxy-1H-pyrazole-5-carboxylate                                                       |
| MZCPYZ10 | 3 |   | COO-          | COOMe  | -6.34   |         | T3c | R.L.Harlow, S.H.Simonsen Acta Crystallogr.,Sect.B:Struct.Crystallogr.Cryst.Chem. (1974), 30, 2505                                                | 1,1,1-Trimethylhydrazinium 3-carbomethoxy-5-pyrazolecarboxylate                                                      |
| LIGKET   | 3 |   | COO-          | COOH   |         | 178.42  | T3t | O.Ugono, N.P.Rath, A.M.Beatty CrystEngComm (2011), 13, 753                                                                                       | Hexane-1,6-diaminium bis(3-carboxy-1H-pyrazole-5-carboxylate)                                                        |
| LIGLAQ   | 3 |   | COO-          | COOH   | -175.29 |         | T3t | O.Ugono, N.P.Rath, A.M.Beatty CrystEngComm (2011), 13, 753                                                                                       | 2,6-Diethylanilinium 3-carboxy-1H-pyrazole-5-carboxylate monohydrate                                                 |
| LIGLEU   | 3 |   | COO-          | COOH   | -162.73 |         | T3t | O.Ugono, N.P.Rath, A.M.Beatty CrystEngComm (2011), 13, 753                                                                                       | 2-Ethylanilinium 3-carboxy-1H-pyrazole-5-carboxylate monohydrate                                                     |
| MARVIM   | 3 |   | COO-          | COOH   |         | 176.84  | T3t | Xiu-Ying Li, Ling Liu, Shan-Shan Wang, Miao-Miao Wang, Guang-Bo Che Z.Kristallogr.-New Cryst.Struct. (2012), 227, 73                             | 4,4'-bipyridinium bis(3-carboxy-1H-pyrazole-5-carboxylate) tetrahydrate                                              |
| PEVQUD   | 3 |   | COO-          | COOH   |         | 179.14  | T3t | V.S.S.Kumar, T.Premkumar, N.P.Rath, S.Govindarajan Indian J.Chem.,Sect.B:Org.Chem.Incl.Med.Chem. (2007), 46, 141                                 | Hydrazonium bis(3-carboxypyrazol-5-carboxylate)                                                                      |
| KUZQOM   |   | 5 | COO-          | COOH   | -3.18   |         | T5c | Xin-Hui Zhou Acta Crystallogr.,Sect.E:Struct.Rep.Online (2010), 66, o2578                                                                        | Piperazine-1,4-dium bis(2-carboxy-1H-pyrazole-4-carboxylate) tetrahydrate                                            |

## Supplementary Materials

|        |  |   |            |               |        |         |     |                                                                                                                                                                               |                                                                                               |
|--------|--|---|------------|---------------|--------|---------|-----|-------------------------------------------------------------------------------------------------------------------------------------------------------------------------------|-----------------------------------------------------------------------------------------------|
| OFUZIY |  | 5 | COO-       | COOH          |        | -179.15 | T5t | A.M.Beatty, C.M.Schneider, A.E.Simpson, J.L.Zaher CrystEngComm (2002), 4, 282                                                                                                 | Propane-1,3-diammonium bis(5-carboxypyrazole-3-carboxylate) trihydrate                        |
| OFUZOE |  | 5 | COO-       | COOH          |        | 179.14  | T5t | A.M.Beatty, C.M.Schneider, A.E.Simpson, J.L.Zaher CrystEngComm (2002), 4, 282                                                                                                 | Butane-1,4-diammonium bis(5-carboxypyrazole-3-carboxylate) tetrahydrate                       |
| MUNZIG |  | 5 | CN         | COOiPro       | 0.74   |         | T5c | P.K.Mykhailiuk Eur.J.Org.Chem. (2015), , 7235                                                                                                                                 | Isopropyl 3-cyano-1H-pyrazole-5-carboxylate                                                   |
| MUNZOM |  | 5 | CN         | COCH2Ph       |        | 179.36  | T5t | P.K.Mykhailiuk Eur.J.Org.Chem. (2015), , 7235                                                                                                                                 | 5-(Phenylacetyl)-1H-pyrazole-3-carbonitrile                                                   |
| MUNZUS |  | 5 | CN         | COcBu         |        | 177.74  | T5t | P.K.Mykhailiuk Eur.J.Org.Chem. (2015), , 7235                                                                                                                                 | 5-(Cyclobutylcarbonyl)-1H-pyrazole-3-carbonitrile                                             |
| MUPBAC |  | 5 | CN         | COCH2Bzl      |        | -174.71 | T5t | P.K.Mykhailiuk Eur.J.Org.Chem. (2015), , 7235                                                                                                                                 | 5-(3-Phenylpropanoyl)-1H-pyrazole-3-carbonitrile                                              |
| APUROU |  | 5 | CF3CHF     | COOMe         | -1.03  |         | T5c | P.Mykhailiuk Private Communication (2016), ,                                                                                                                                  | methyl 3-(1,2,2,2-tetrafluoroethyl)-1H-pyrazole-5-carboxylate                                 |
| APURUA |  | 5 | CF3CHF     | COOtBu        | -4.94  |         | T5c | P.Mykhailiuk Private Communication (2016), ,                                                                                                                                  | t-butyl 3-(1,2,2,2-tetrafluoroethyl)-1H-pyrazole-5-carboxylate                                |
| GOWLEL |  | 5 | CHF2       | COOMe         | 0.00   |         | T5c | P.Mykhailiuk Angew.Chem.,Int.Ed. (2015), 54, 6558                                                                                                                             | methyl 3-(difluoromethyl)-1H-pyrazole-5-carboxylate                                           |
| GOWLOV |  | 5 | CHF2       | COOEt         | 1.30   |         | T5c | P.Mykhailiuk Angew.Chem.,Int.Ed. (2015), 54, 6558                                                                                                                             | ethyl 3-(difluoromethyl)-1H-pyrazole-5-carboxylate                                            |
| KORWIZ |  | 5 | CHF2CF2    | COOiPro       | -10.46 |         | T5c | P.K.Mykhailiuk Org.Biomol.Chem. (2015), 13, 3438                                                                                                                              | isopropyl 3-(1,1,2,2-tetrafluoroethyl)-1H-pyrazole-5-carboxylate                              |
| WIXLUM |  | 5 | CF3        | COOMe         | 0.00   |         | T5c | Evgeniy Y.Slobodyanyuk, O.S.Artamonov, O.V.Shishkin, P.K.Mykhailiuk Eur.J.Org.Chem. (2014), , 2487                                                                            | methyl 3-(trifluoromethyl)-1H-pyrazole-5-carboxylate                                          |
| VOVXIP |  | 5 | CHF2       | COMe          |        | 176.94  | T5t | P.Mykhailiuk Angew.Chem.,Int.Ed. (2015), 54, 6558                                                                                                                             | 1-(3-(Difluoromethyl)-1H-pyrazol-5-yl)ethanone                                                |
| APUSAH |  | 5 | CF3CHF     | CONMe2        |        | 153.61  | T5t | P.Mykhailiuk Private Communication (2016), ,                                                                                                                                  | N,N-dimethyl-3-(1,2,2,2-tetrafluoroethyl)-1H-pyrazole-5-carboxamide                           |
| VOVXIP |  | 5 | CHF2       | COMe          |        | 176.94  | T5t | Angew.Chem.,Int.Ed. (2015), 54, 6558 Angew.Chem.,Int.Ed. (2015), 54, 6558                                                                                                     | 1-(3-(Difluoromethyl)-1H-pyrazol-5-yl)ethanone                                                |
| QARVOU |  | 5 | HO-        | COOEt         |        | 174.26  | T5t | L.Infantes, C.Foces-Foces, R.M.Claramunt, C.Lopez, J.Elguero J.Mol.Struct. (1998), 447, 71                                                                                    | 5-Ethoxycarbonyl-3-hydroxypyrazole                                                            |
| APUSEL |  | 3 |            | difluorovinyl | COOMe  | 0.00    | T3c | P.Mykhailiuk Private Communication (2016)                                                                                                                                     | methyl 5-(1,2-difluorovinyl)-1H-pyrazole-3-carboxylate dihydrate                              |
| BIYJIE |  | 3 |            | ferrocenyl    | COOMe  | -16.33  | T3c | C.Obuah, A.Munyaneza, I.A.Guzei, J.Darkwa Dalton Trans. (2014), 43, 8940                                                                                                      | 3-(Ethoxycarbonyl)-5-ferrocenylpyrazole                                                       |
| VIXPAV |  | 3 |            | Py            | CONHN- | 12.22   | T3c | S.Bala, A.Goswami, Satirtha Sengupta, Sumi Ganguly, S.Bhattacharya, S.Khanra, R.Mondal S.Bala, A.Goswami, Satirtha Sengupta, Sumi Ganguly, S.Bhattacharya, S.Khanra, R.Mondal | 5-(Pyridin-2-yl)-N'-(pyridin-2-ylmethylene)-1H-pyrazole-3-carbohydrazide acetonitrile solvate |
| ICEQAK |  | 3 |            | CONHPh        | COOEt  |         | T3t | Jing-Jing Qi, You-Jun Zhou, Xue-Fei Liu, Li-Li Ding, Can-Hui Zheng, Chun-Quan Sheng, Jia-Guo Lv, Ju Zhu Jiegou Huaxue(Chin.)(Chinese J.Struct.Chem.) (2011), 30, 1604         | Ethyl 5-(4-((phenylacetyl)amino)phenyl)-1H-pyrazole-3-carboxylate                             |
| PUJLIR |  | 5 | 4-NO2PhCO- | COOEt         |        | -178.37 | T5t | Wen-Ming Shu, Jun-Rui Ma, Kai-Lu Zheng, Hui-Ying Sun, Mei Wang, Yan Yang, An-Xin Wu Tetrahedron (2014), 70, 9321                                                              | ethyl 3-(4-nitrobenzoyl)-1H-pyrazole-5-carboxylate                                            |
| PUJLIR |  | 5 | 4-NO2PhCO- | COOEt         |        | -178.37 | T5t | Wen-Ming Shu, Jun-Rui Ma, Kai-Lu Zheng, Hui-Ying Sun, Mei Wang, Yan Yang, An-Xin Wu Tetrahedron (2014), 70, 9321                                                              | ethyl 3-(4-nitrobenzoyl)-1H-pyrazole-5-carboxylate                                            |
| YOTHIZ |  | 5 | NHCSNH     | COOMe         |        | -171.40 | T5t | B.Huang, P.-P.Kung, A.L.Rheingold, A.DiPasquale, A.Yanovsky Acta Crystallogr.,Sect.E:Struct.Rep.Online (2009), 65, o1249                                                      | Methyl 3-(3-(ethoxycarbonyl)thioeido)-1H-pyrazole-5-carboxylate                               |

Supplementary Materials

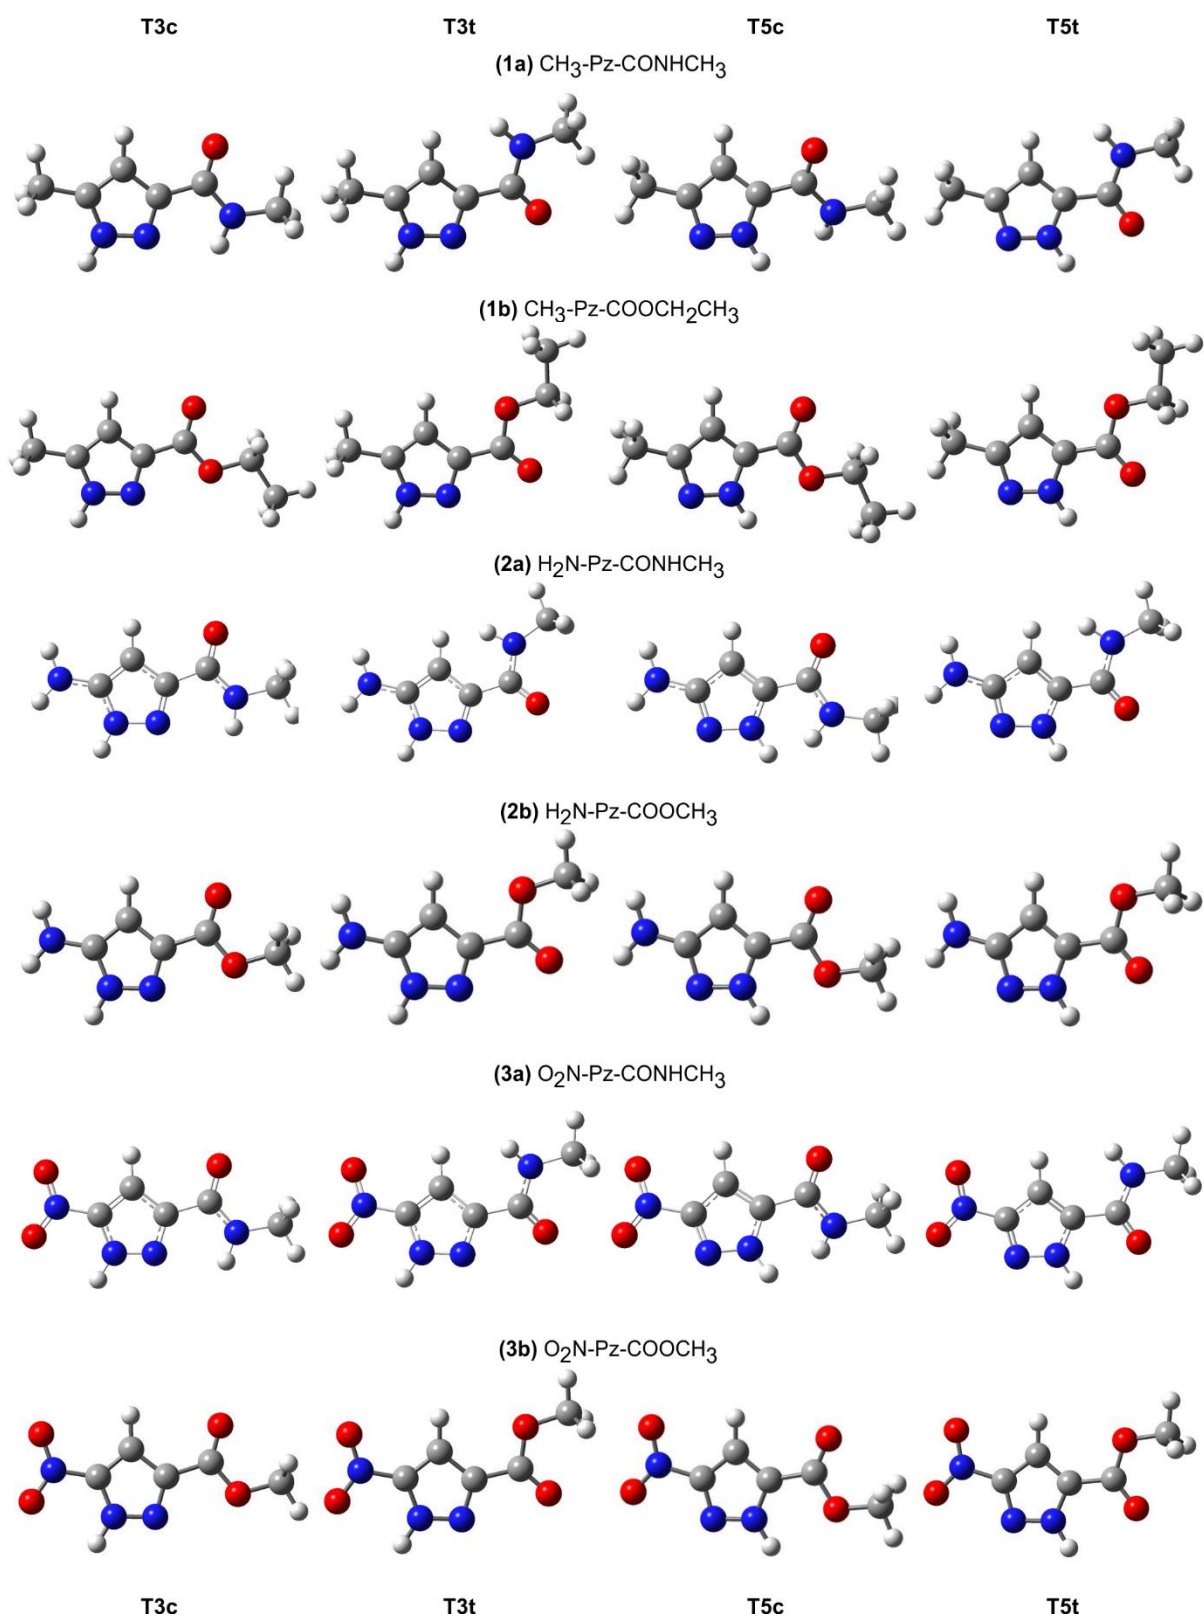

Figure 1S. Tautomers and conformers of the studied molecules calculated *in vacuo*.

## Supplementary Materials

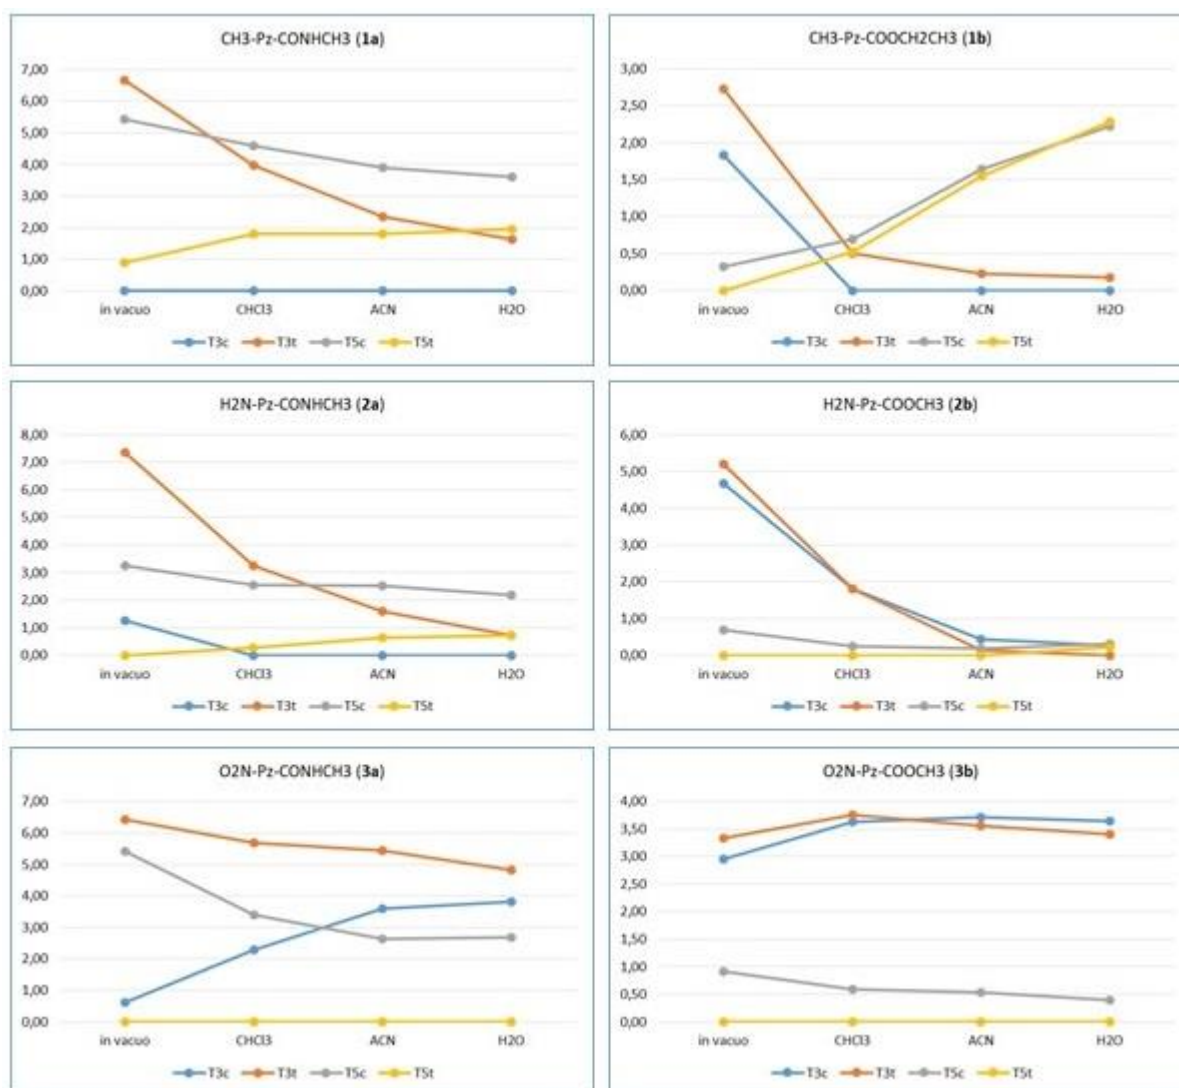

**Figure 2S.** The change of relative energy (kcal/mol) for the structures (see Table 3) of the studied compounds 1-3.

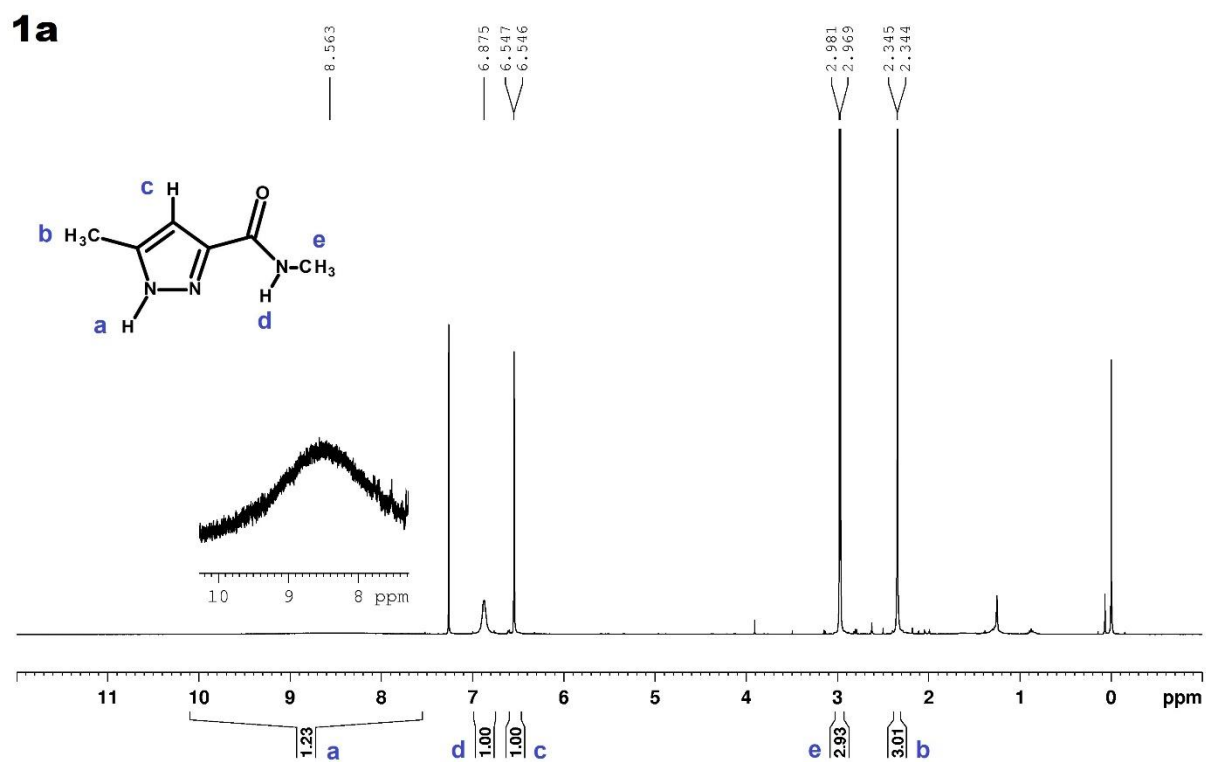

Figure 3S. <sup>1</sup>H NMR spectrum of *N*-methyl 5-methyl-1*H*-pyrazole-3-carboxamide (**1a**) in CDCl<sub>3</sub>.

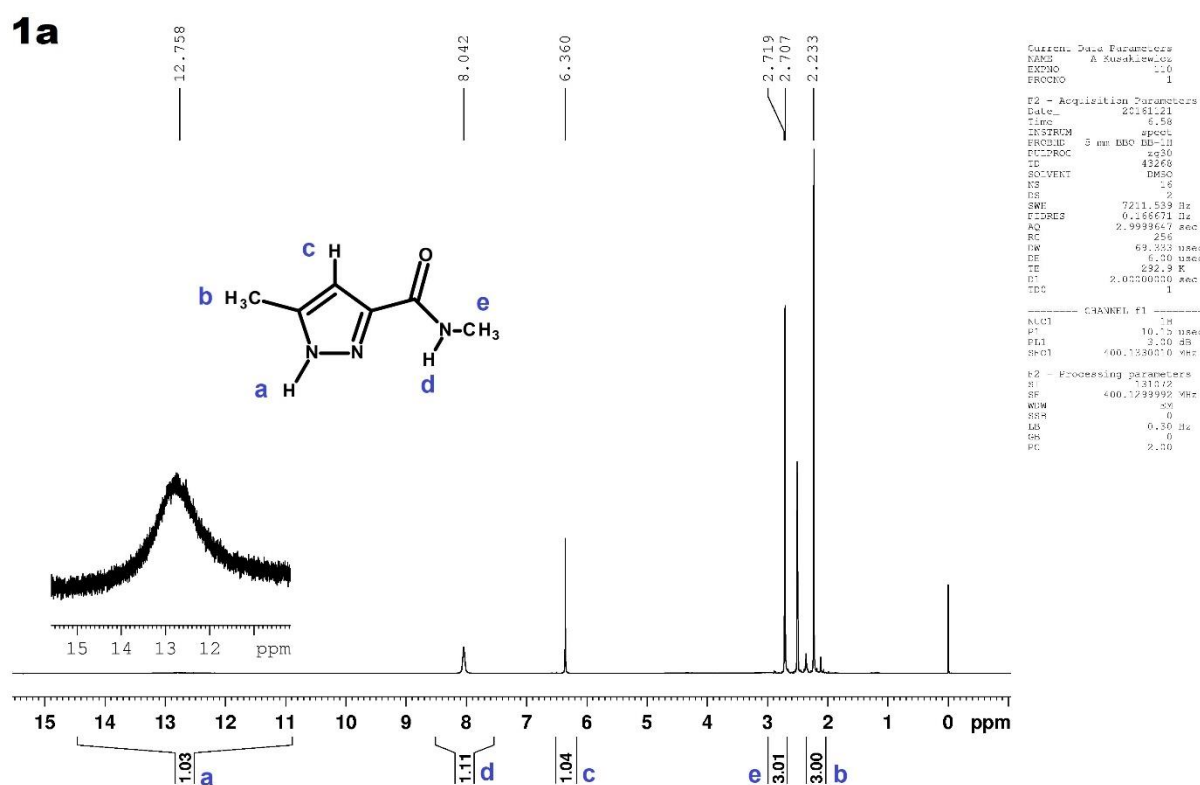

Figure 4S. <sup>1</sup>H NMR spectrum of *N*-methyl 5-methyl-1*H*-pyrazole-3-carboxamide (**1a**) in DMSO-*d*<sub>6</sub>.



Supplementary Materials

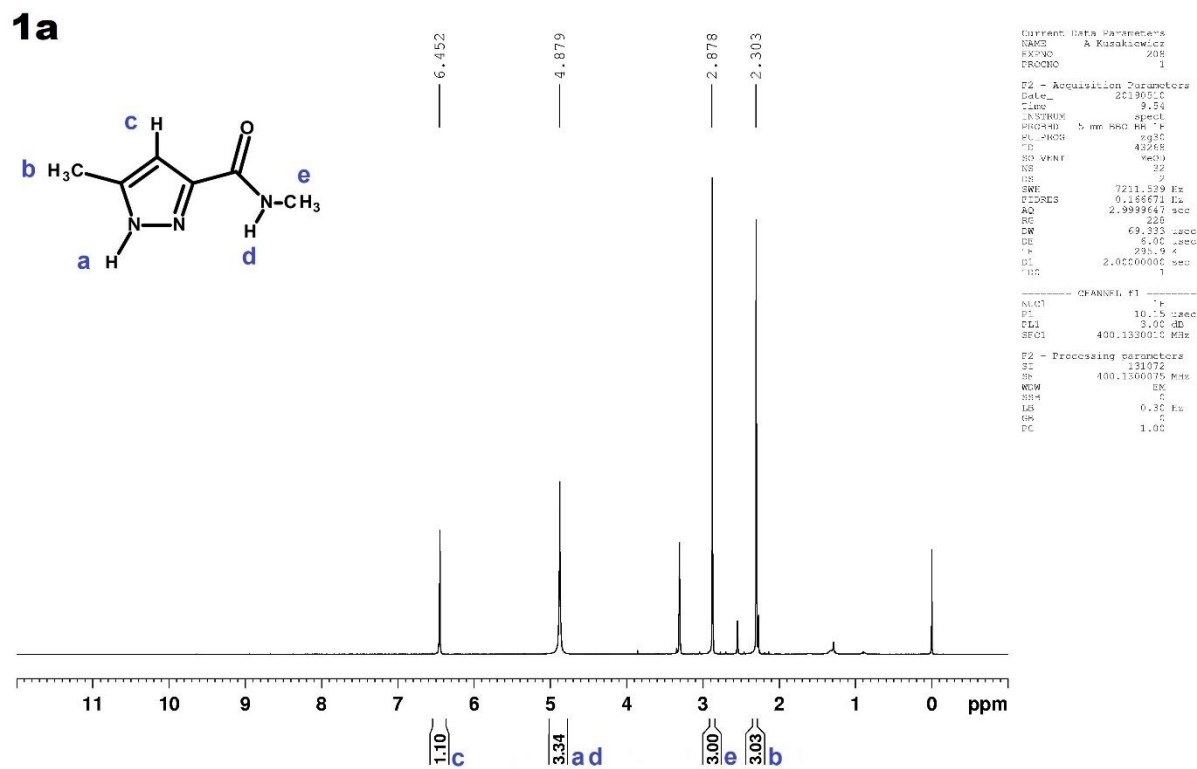

Figure 5S. <sup>1</sup>H NMR spectrum of *N*-methyl 5-methyl-1*H*-pyrazole-3-carboxamide (**1a**) in CD<sub>3</sub>OD.

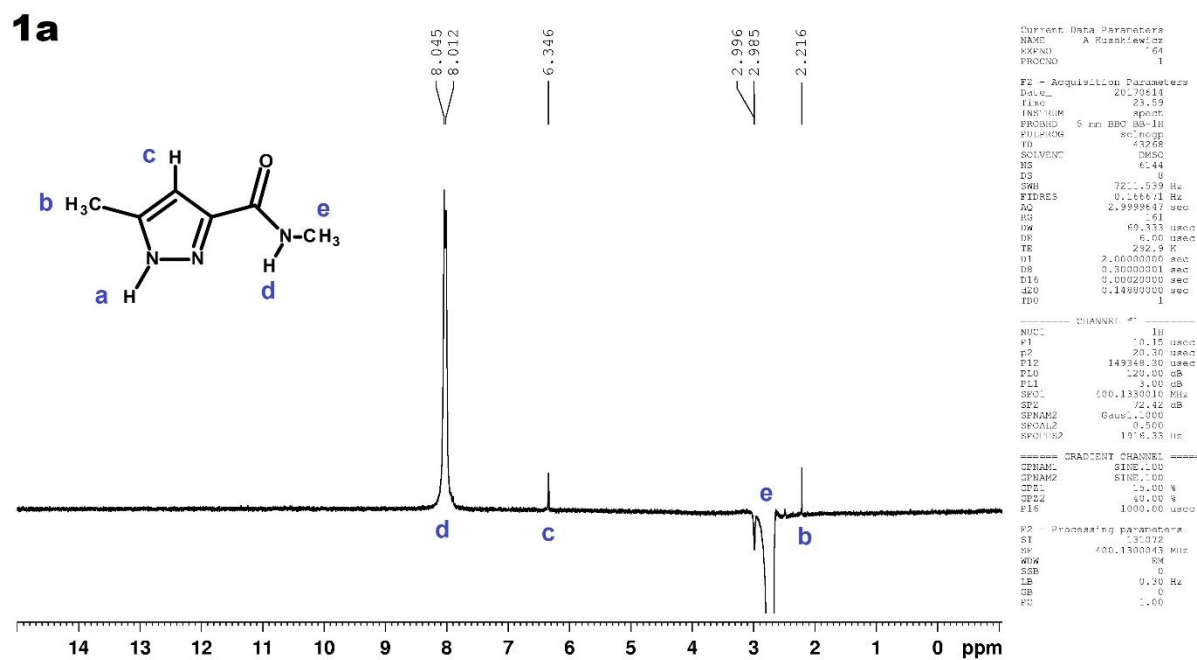

Figure 6S. NOE spectrum of *N*-methyl 5-methyl-1*H*-pyrazole-3-carboxamide (**1a**) in DMSO-*d*<sub>6</sub>.

# Supplementary Materials

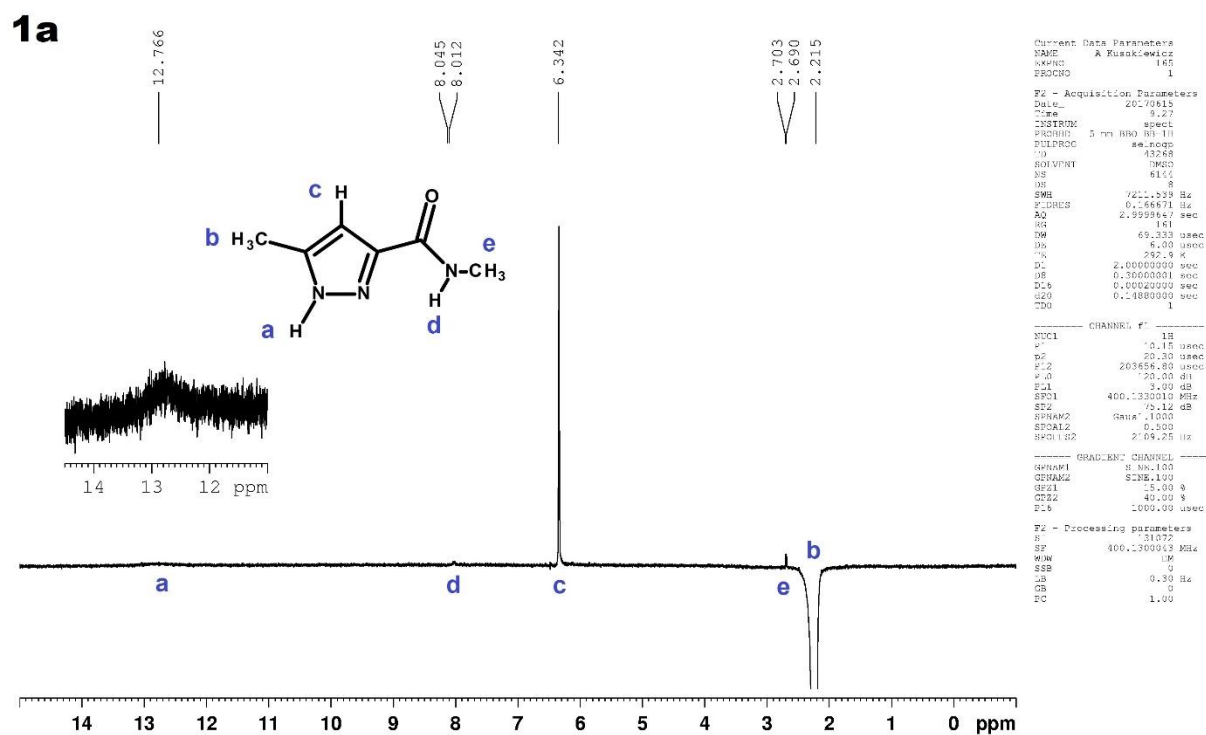

Figure 7S. NOE spectrum of *N*-methyl 5-methyl-1*H*-pyrazole-3-carboxamide (**1a**) in DMSO- $d_6$ .

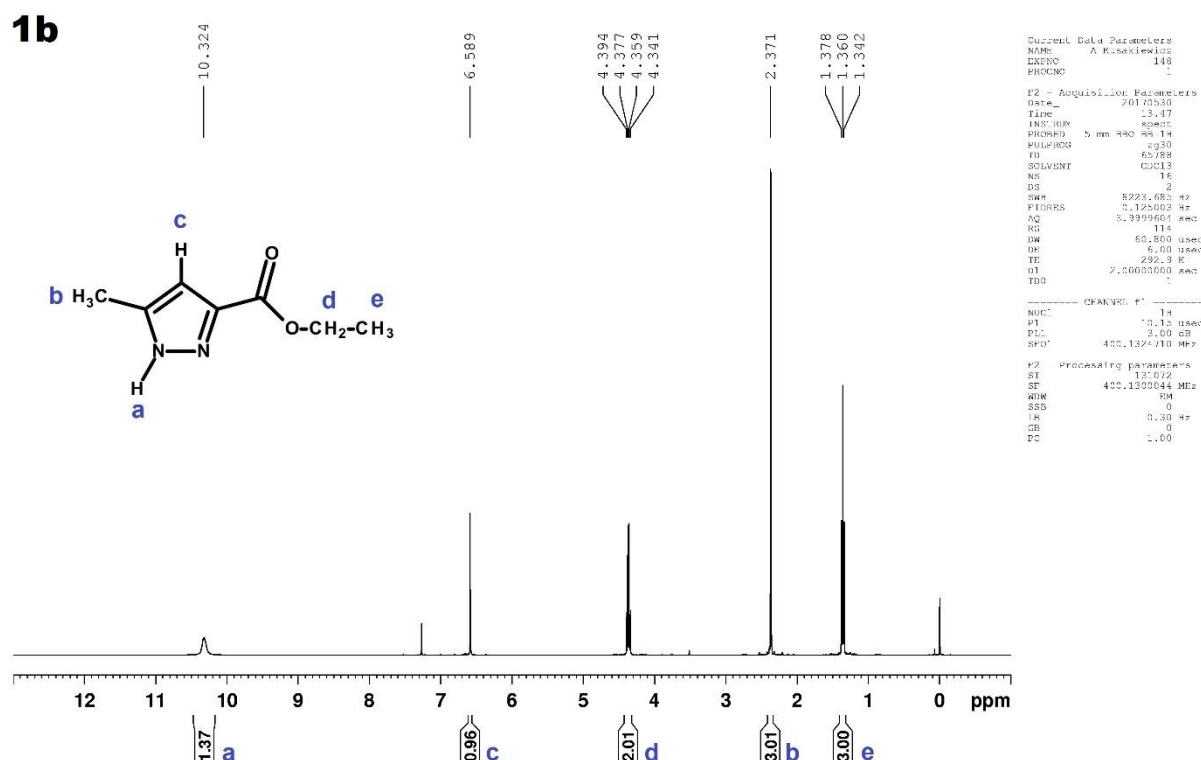

Figure 8S.  $^1\text{H}$  NMR spectrum of ethyl 5-methyl-1*H*-pyrazole-3-carboxylate (**1b**) in  $\text{CDCl}_3$ .

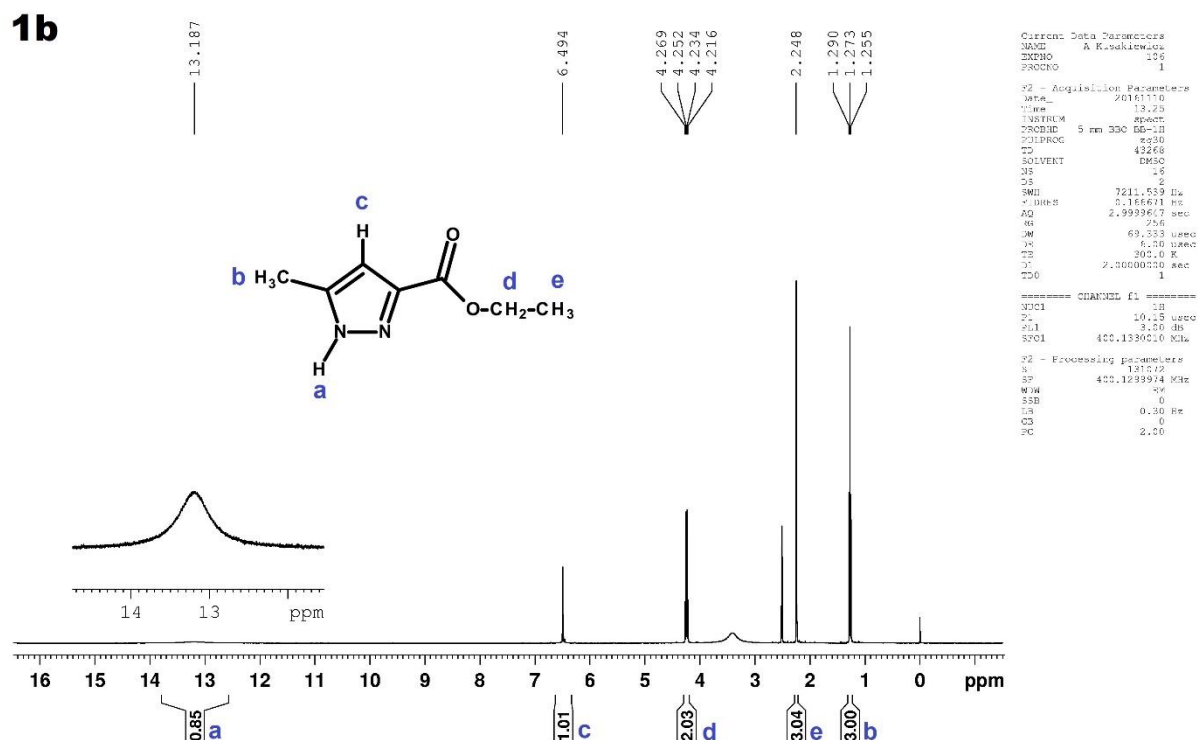Figure 9S. <sup>1</sup>H NMR spectrum of ethyl 5-methyl-1*H*-pyrazole-3-carboxylate (**1b**) in DMSO-*d*<sub>6</sub>.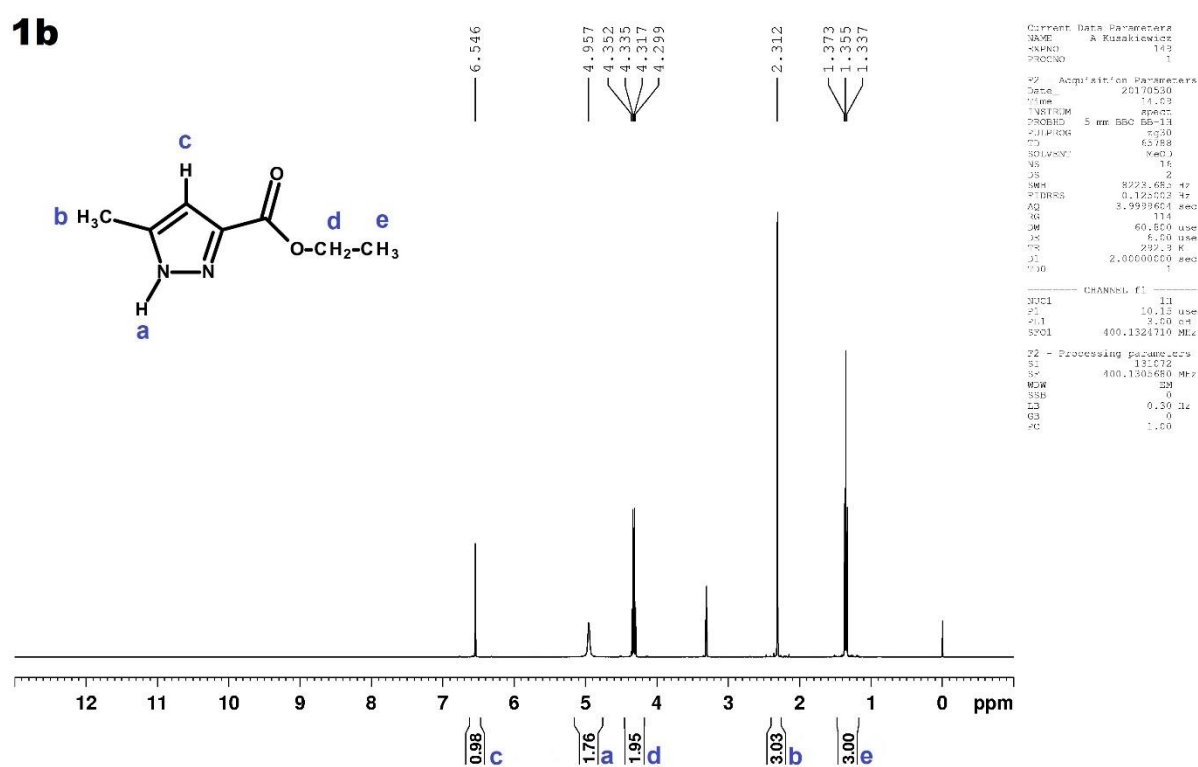Figure 10S. <sup>1</sup>H NMR spectrum of ethyl 5-methyl-1*H*-pyrazole-3-carboxylate (**1b**) in CD<sub>3</sub>OD.



Supplementary Materials

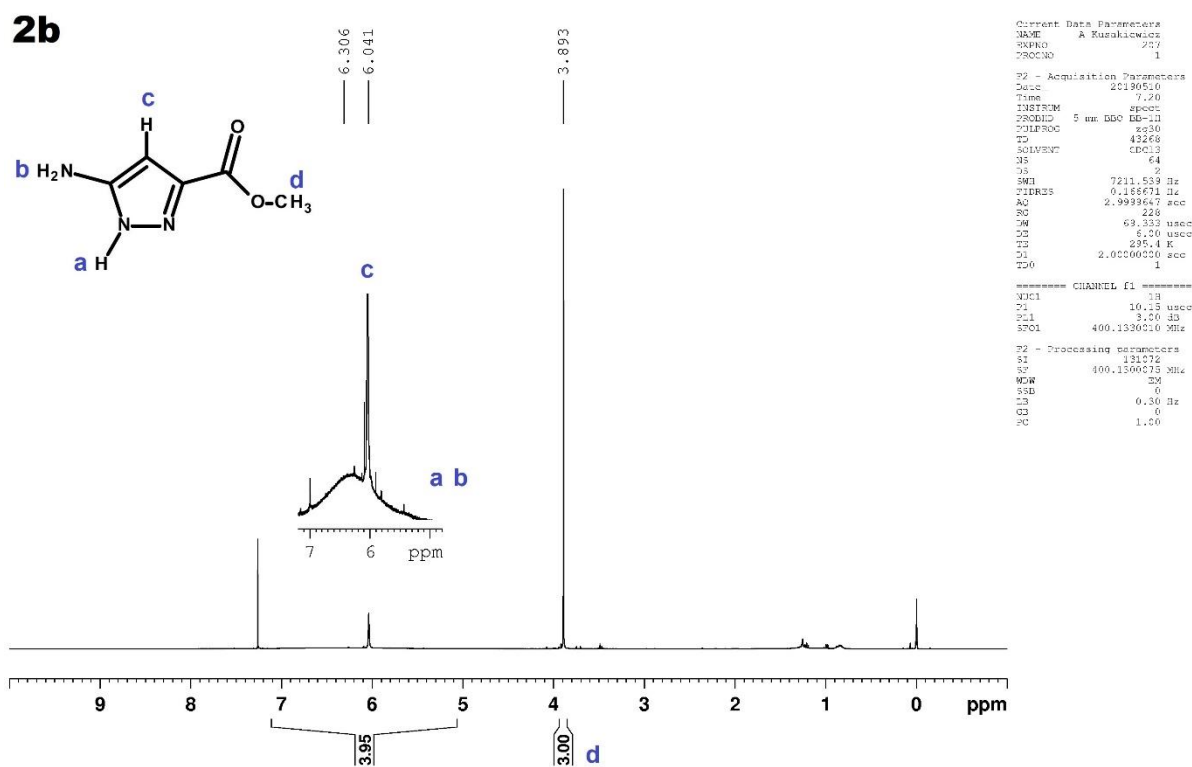

Figure 13S. <sup>1</sup>H NMR spectrum of methyl 5(3)-amino-1H-pyrazole-3(5)-carboxylate (**2b**) in CDCl<sub>3</sub>.

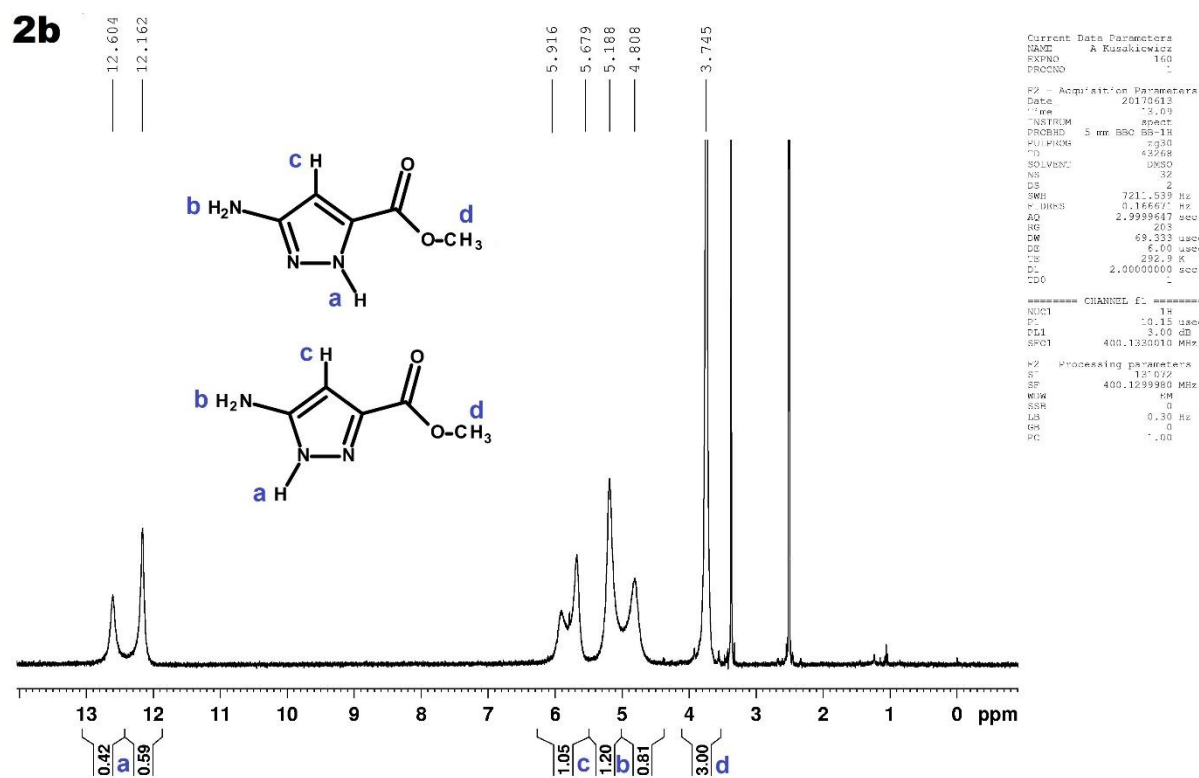

Figure 14S. <sup>1</sup>H NMR spectrum of methyl 5(3)-amino-1H-pyrazole-3(5)-carboxylate (**2b**) in DMSO-d<sub>6</sub>.

**2b**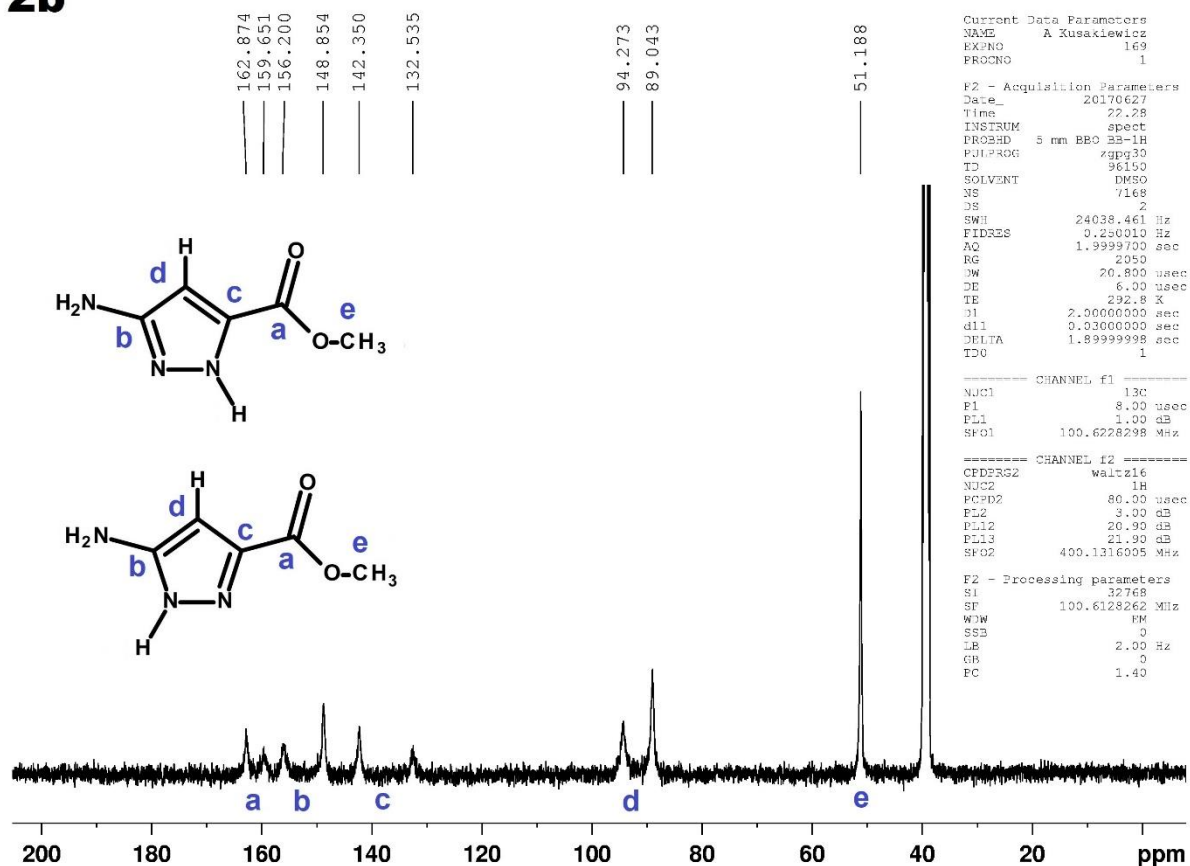Figure 15S. <sup>13</sup>C NMR spectrum of methyl 5(3)-amino-1*H*-pyrazole-3(5)-carboxylate (**2b**) in DMSO-*d*<sub>6</sub>.**2b**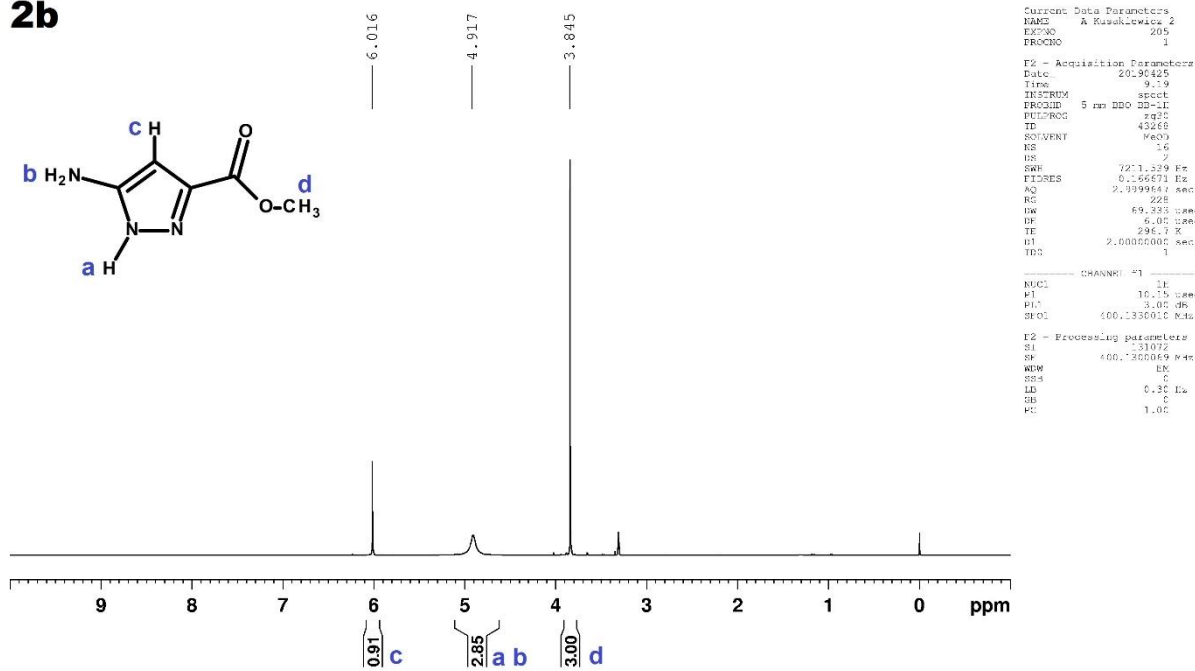Figure 16S. <sup>1</sup>H NMR spectrum of methyl 5(3)-amino-1*H*-pyrazole-3(5)-carboxylate (**2b**) in CD<sub>3</sub>OD.



## Supplementary Materials

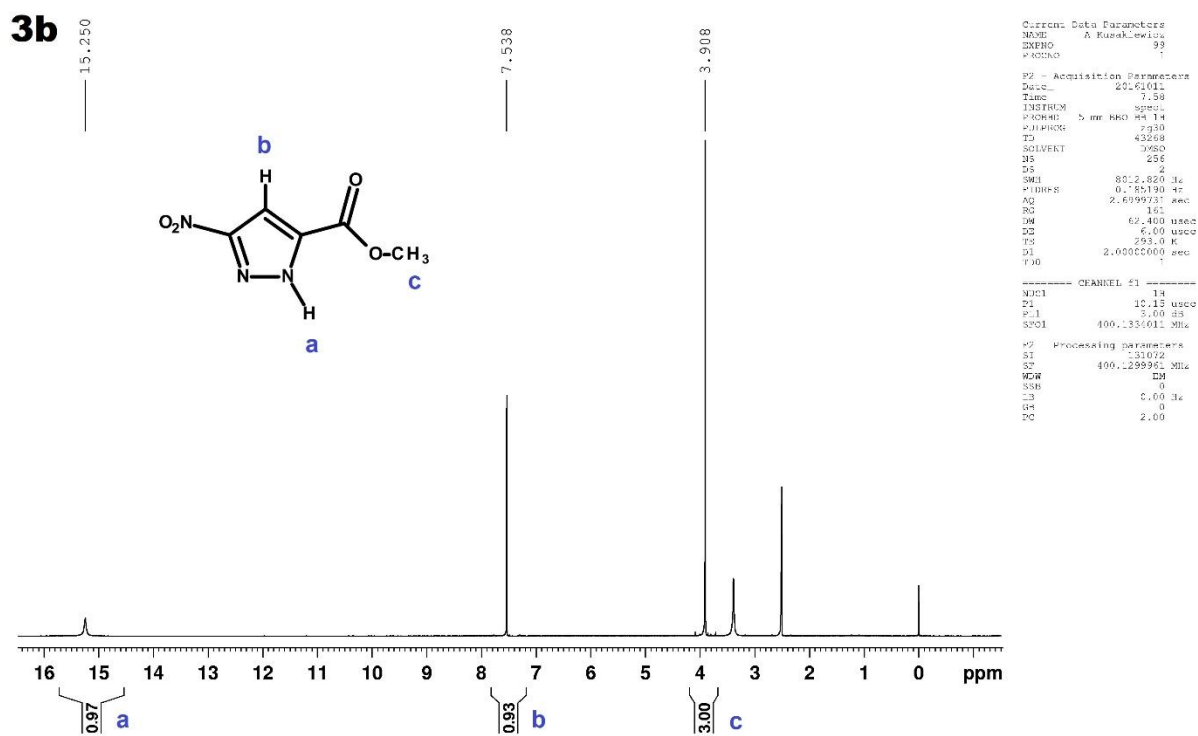

Figure 19S. <sup>1</sup>H NMR spectrum of methyl 3-nitro-1H-pyrazole-5-carboxylate (**3b**) in DMSO-d<sub>6</sub>.

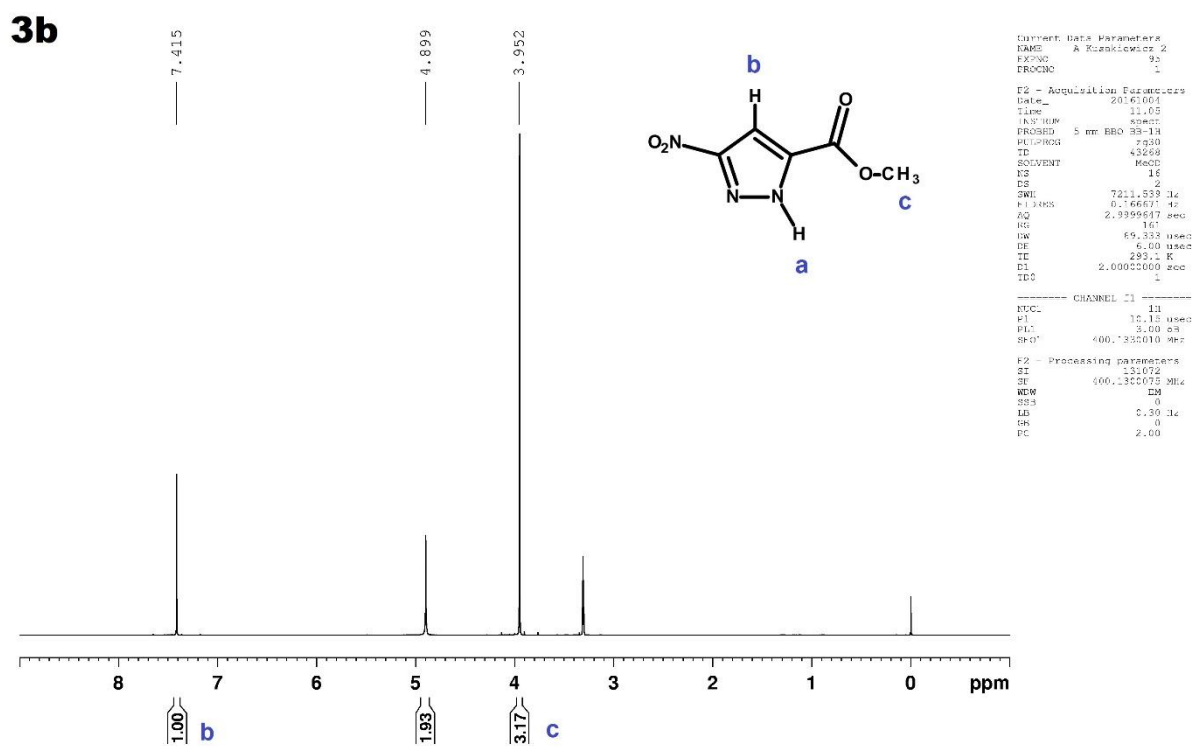

Figure 20S. <sup>1</sup>H NMR spectrum of methyl 3-nitro-1H-pyrazole-5-carboxylate (**3b**) in CD<sub>3</sub>OD.



Supplementary Materials

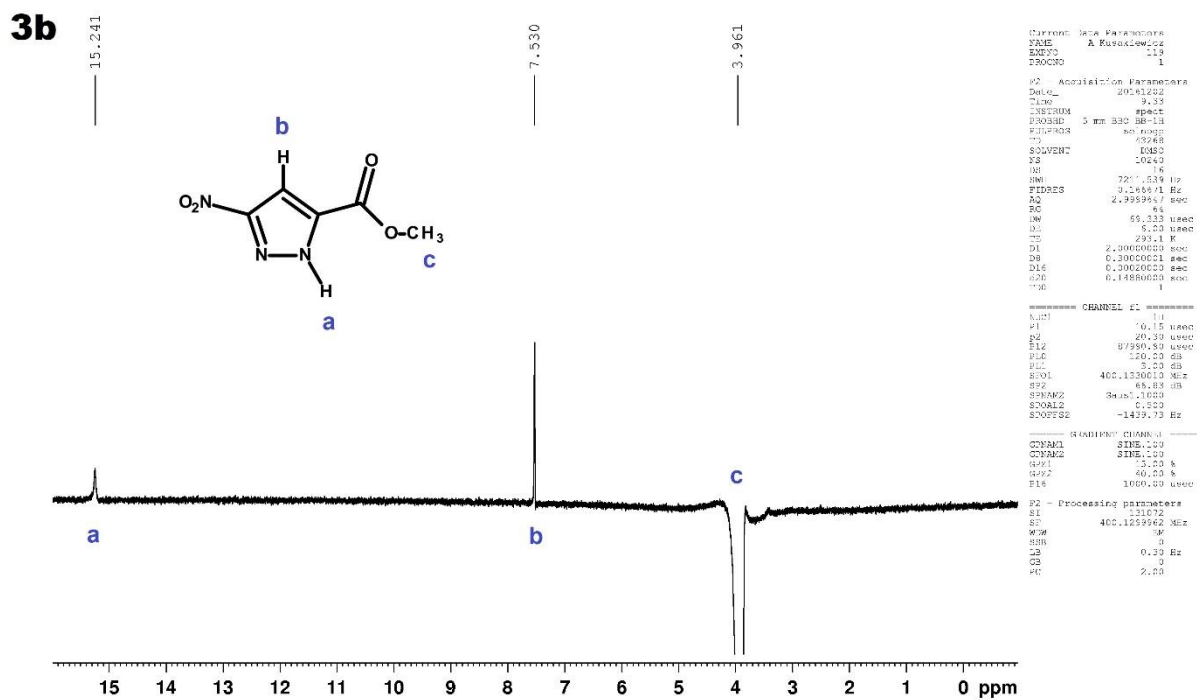

Figure 21S. NOE spectrum of methyl 3-nitro-1H-pyrazole-5-carboxylate (**3b**) in DMSO-d<sub>6</sub>.

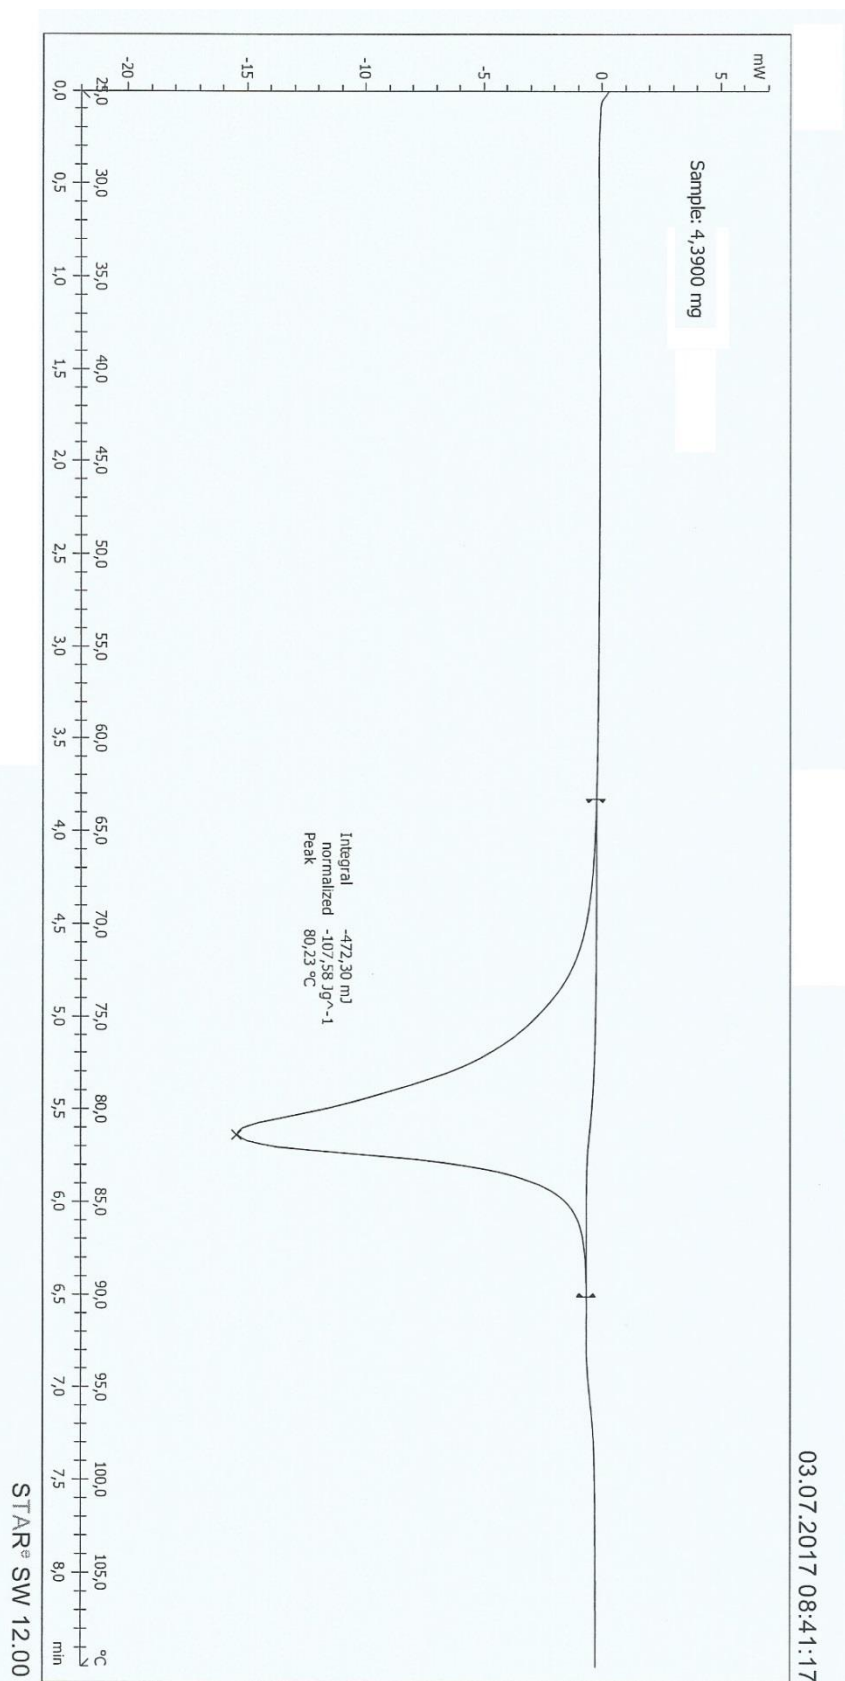

Figure 22S. DSC of ethyl 5-methyl-1H-pyrazole-3-carboxylate (1b)

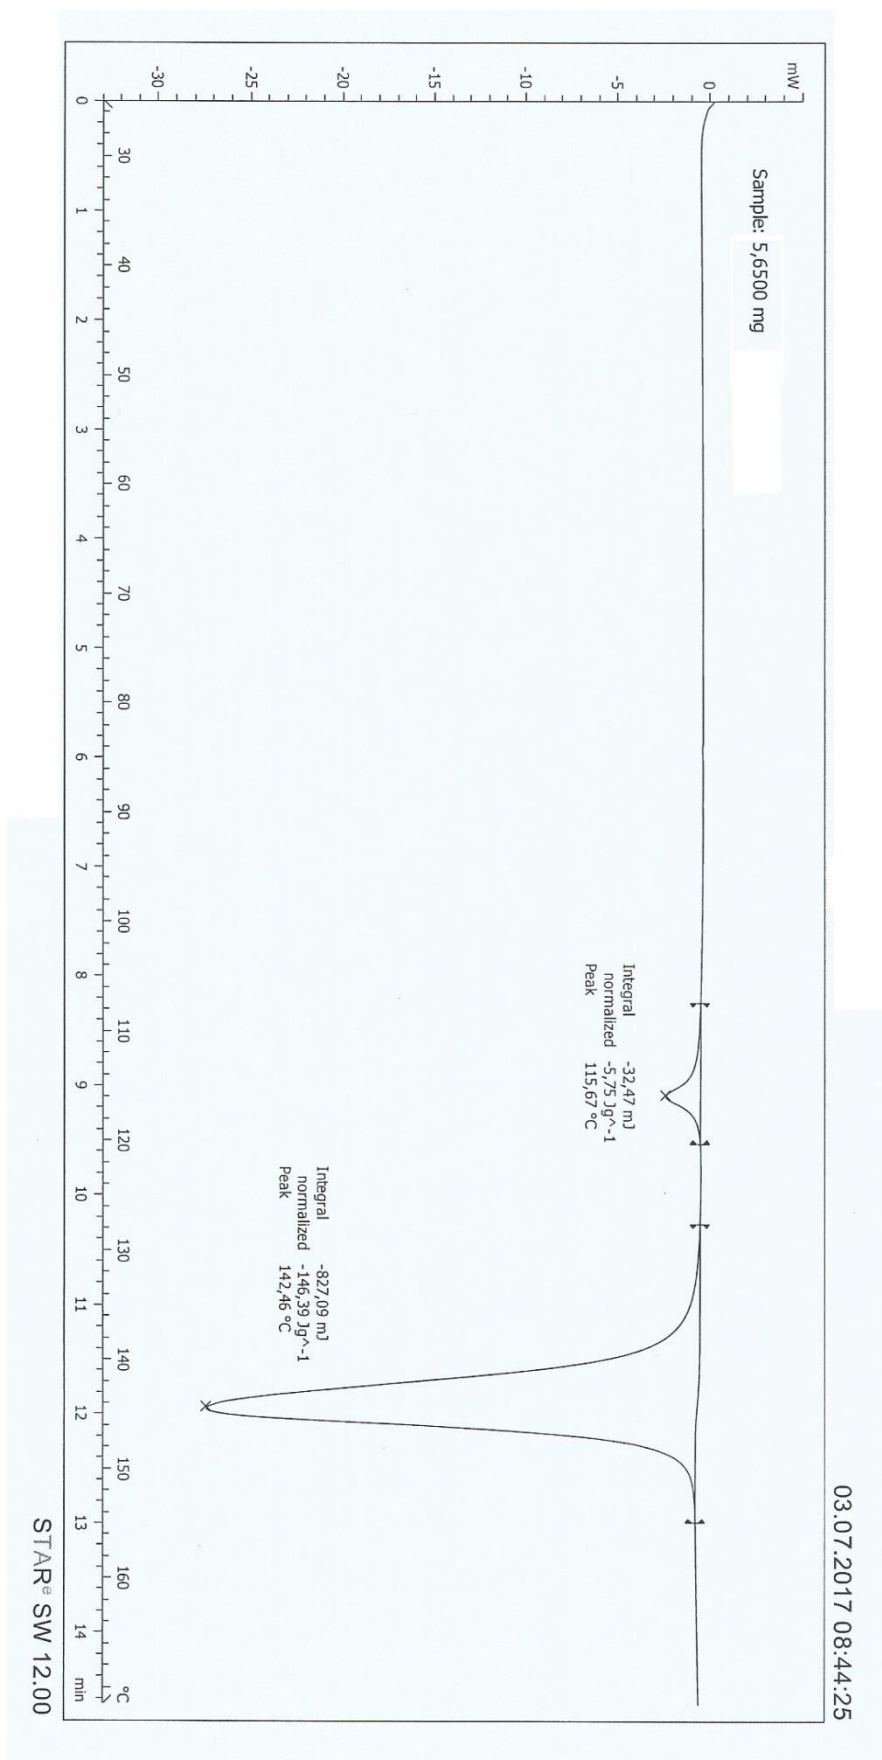

Figure 23S. DSC of methyl 5(3)-amino-1H-pyrazole-3(5)-carboxylate (2b)

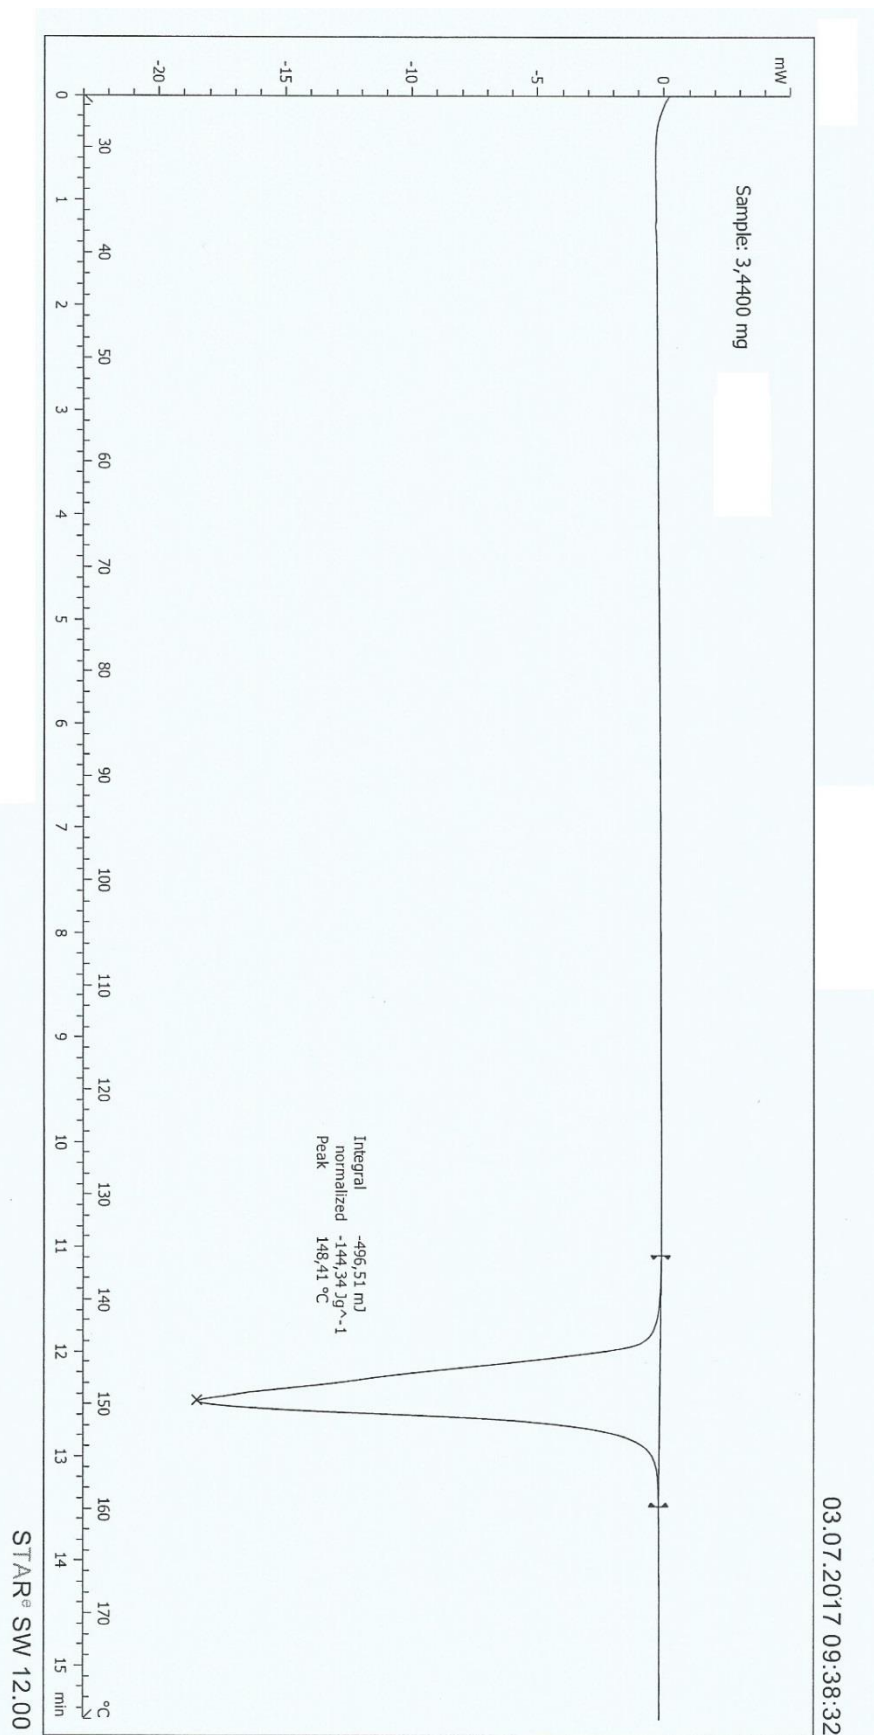

Figure 24S. DSC of methyl 3-nitro-1H-pyrazole-5-carboxylate (3b).
